# Supplementary material for: A computational investigation into the substituent effect on the chemo- and stereoselectivity of crossed intermolecular radical anion [2 + 2] cycloadditions of enones
Source: Royal Society of Chemistry journal article supplement (doi:10.1039/c4ra13816c), 2014-01-01
Supplement: c4ra13816c1.pdf [file c4ra13816c1.pdf]

## A computational investigation on the substituent effect on the chemo- and stereoselectivity of crossed intermolecular radical anion [2+2] cycloadditions of enones

Chenchen Guo <sup>a</sup>, Huiqun Wang <sup>a</sup>, Bo-Zhen Chen <sup>a,\*</sup>, Zhiyuan Tian <sup>a</sup>

<sup>a</sup>*School of Chemistry and Chemical Engineering, University of Chinese Academy of Sciences, No. 19A, YuQuan Road, Beijing 100049, P. R. China*

**Table S1 Main geometrical and electronic parameters<sup>a</sup> of critical structures for the cycloadditions.**

| Reactions          | Structures | C1-C3 |      | C2-C4 |      | $\mu$ [D] | t [e] |
|--------------------|------------|-------|------|-------|------|-----------|-------|
|                    |            | r [Å] | l    | r [Å] | l    |           |       |
| <b>1 (R1a+R2a)</b> | PC         | 3.01  |      | 4.62  |      | 2.22      | 0.39  |
|                    | TS1        | 2.16  | 0.67 | 4.03  | 0.96 | 4.73      | 0.43  |
|                    | IM         | 1.63  |      | 3.86  |      | 4.93      | 0.52  |
|                    | TS2-trans  | 1.54  | 1.00 | 2.00  | 0.75 | 2.29      | 0.78  |
|                    | P-trans    | 1.55  |      | 1.60  |      | 2.29      | 0.45  |
|                    | TS2-cis    | 1.54  | 1.00 | 2.02  | 0.74 | 6.06      | 0.84  |
|                    | P-cis      | 1.55  |      | 1.60  |      | 4.75      | 0.40  |
| <b>2 (R1b+R2a)</b> | PC         | 3.72  |      | 5.19  |      | 0.81      | 0.23  |
|                    | TS1        | 2.14  | 0.69 | 4.01  | 0.96 | 5.80      | 0.41  |
|                    | IM         | 1.63  |      | 3.86  |      | 5.76      | 0.52  |
|                    | TS2-trans  | 1.54  | 1.00 | 2.04  | 0.72 | 5.75      | 0.53  |
|                    | P-trans    | 1.55  |      | 1.59  |      | 1.93      | 0.41  |
|                    | TS2-cis    | 1.54  | 1.00 | 2.05  | 0.72 | 6.54      | 0.58  |
|                    | P-cis      | 1.55  |      | 1.60  |      | 4.56      | 0.41  |
| <b>3 (R1c+R2a)</b> | PC         | 3.00  |      | 4.61  |      | 7.41      | 0.43  |
|                    | TS1        | 2.17  | 0.67 | 4.04  | 0.95 | 9.56      | 0.51  |
|                    | IM         | 1.63  |      | 3.86  |      | 9.60      | 0.58  |
|                    | TS2-trans  | 1.54  | 1.00 | 1.96  | 0.78 | 5.65      | 0.63  |
|                    | P-trans    | 1.55  |      | 1.61  |      | 3.13      | 0.50  |
|                    | TS2-cis    | 1.54  | 1.00 | 1.97  | 0.78 | 8.45      | 0.62  |
|                    | P-cis      | 1.55  |      | 1.60  |      | 4.94      | 0.43  |
| <b>4 (R1d+R2a)</b> | PC         | 5.20  |      | 6.24  |      | 8.55      | 0.02  |
|                    | TS1        | 1.99  | 0.77 | 3.91  | 0.98 | 2.68      | 0.40  |
|                    | IM         | 1.62  |      | 3.85  |      | 1.92      | 0.45  |
|                    | TS2-trans  | 1.54  | 1.00 | 2.39  | 0.48 | 1.47      | 0.60  |
|                    | P-trans    | 1.55  |      | 1.57  |      | 10.50     | 0.26  |
|                    | TS2-cis    | 1.54  | 1.00 | 2.38  | 0.50 | 4.29      | 0.56  |

|                               |                  |      |      |      |      |       |      |
|-------------------------------|------------------|------|------|------|------|-------|------|
|                               | <b>P-cis</b>     | 1.55 |      | 1.59 |      | 10.35 | 0.37 |
| <b>5</b><br><b>(R1e+R2a)</b>  | <b>PC</b>        | 3.00 |      | 4.63 |      | 7.23  | 0.46 |
|                               | <b>TS1</b>       | 2.17 | 0.67 | 4.05 | 0.95 | 8.84  | 0.51 |
|                               | <b>IM</b>        | 1.63 |      | 3.86 |      | 8.96  | 0.59 |
|                               | <b>TS2-trans</b> | 1.54 | 1.00 | 1.94 | 0.80 | 4.86  | 0.65 |
|                               | <b>P-trans</b>   | 1.55 |      | 1.61 |      | 3.15  | 0.51 |
|                               | <b>TS2-cis</b>   | 1.54 | 1.00 | 1.96 | 0.78 | 7.73  | 0.63 |
|                               | <b>P-cis</b>     | 1.55 |      | 1.61 |      | 5.29  | 0.44 |
| <b>6 (R1f+R2a)</b>            | <b>PC</b>        | 3.00 |      | 4.58 |      | 2.49  | 0.40 |
|                               | <b>TS1</b>       | 2.14 | 0.69 | 4.02 | 0.96 | 4.46  | 0.52 |
|                               | <b>IM</b>        | 1.63 |      | 3.86 |      | 4.73  | 0.61 |
|                               | <b>TS2-trans</b> | 1.54 | 1.00 | 2.01 | 0.74 | 1.72  | 0.71 |
|                               | <b>P-trans</b>   | 1.55 |      | 1.60 |      | 3.32  | 0.48 |
|                               | <b>TS2-cis</b>   | 1.54 | 1.00 | 2.02 | 0.74 | 5.78  | 0.69 |
|                               | <b>P-cis</b>     | 1.55 |      | 1.60 |      | 5.28  | 0.48 |
| <b>7</b><br><b>(R1g+R2a)</b>  | <b>PC</b>        | 4.74 |      | 6.11 |      | 2.59  | 0.13 |
|                               | <b>TS1</b>       | 2.11 | 0.63 | 4.02 | 0.42 | 4.31  | 0.50 |
|                               | <b>IM</b>        | 1.54 |      | 2.54 |      | 3.18  | 0.75 |
|                               | <b>TS2-trans</b> | 1.54 | 1.00 | 2.01 | 0.74 | 2.44  | 0.72 |
|                               | <b>P-trans</b>   | 1.55 |      | 1.60 |      | 4.35  | 0.47 |
|                               | <b>TS2-cis</b>   | 1.55 | 1.00 | 2.02 | 0.74 | 6.10  | 0.66 |
|                               | <b>P-cis</b>     | 1.55 |      | 1.60 |      | 6.04  | 0.35 |
| <b>8</b><br><b>(R1a+R2b)</b>  | <b>PC</b>        | 3.49 |      | 5.01 |      | 5.11  | 0.21 |
|                               | <b>TS1</b>       | 2.14 | 0.70 | 4.01 | 0.96 | 2.28  | 0.43 |
|                               | <b>IM</b>        | 1.64 |      | 3.86 |      | 2.97  | 0.43 |
|                               | <b>TS2-trans</b> | 1.54 | 1.00 | 2.00 | 0.73 | 1.13  | 0.49 |
|                               | <b>P-trans</b>   | 1.55 |      | 1.58 |      | 3.07  | 0.15 |
|                               | <b>TS2-cis</b>   | 1.54 | 1.00 | 2.01 | 0.75 | 5.17  | 0.47 |
|                               | <b>P-cis</b>     | 1.55 |      | 1.61 |      | 5.32  | 0.12 |
| <b>9</b><br><b>(R1a+R2c)</b>  | <b>PC</b>        | 3.58 |      | 5.07 |      | 4.62  | 0.14 |
|                               | <b>TS1</b>       | 2.11 | 0.71 | 4.01 | 0.96 | 2.97  | 0.49 |
|                               | <b>IM</b>        | 1.63 |      | 3.86 |      | 2.86  | 0.60 |
|                               | <b>TS2-trans</b> | 1.54 | 1.00 | 2.05 | 0.72 | 2.77  | 0.69 |
|                               | <b>P-trans</b>   | 1.55 |      | 1.60 |      | 4.90  | 0.56 |
|                               | <b>TS2-cis</b>   | 1.54 | 1.00 | 2.03 | 0.73 | 4.31  | 0.65 |
|                               | <b>P-cis</b>     | 1.55 |      | 1.60 |      | 3.99  | 0.53 |
| <b>10</b><br><b>(R1a+R2d)</b> | <b>PC</b>        | 8.61 |      | 6.70 |      | 4.88  | 0.10 |
|                               | <b>TS1</b>       | 2.13 | 0.69 | 3.99 | 0.96 | 10.32 | 0.34 |
|                               | <b>IM</b>        | 1.63 |      | 3.85 |      | 11.96 | 0.21 |
|                               | <b>TS2-trans</b> | 1.54 | 1.00 | 2.16 | 0.63 | 6.11  | 0.24 |
|                               | <b>P-trans</b>   | 1.55 |      | 1.58 |      | 10.64 | 0.23 |
|                               | <b>TS2-cis</b>   | 1.54 | 1.00 | 2.10 | 0.66 | 7.85  | 0.07 |
|                               | <b>P-cis</b>     | 1.55 |      | 1.57 |      | 10.45 | 0.19 |
|                               | <b>PC</b>        | 4.34 |      | 6.22 |      | 2.11  | 0.37 |

|                     |                  |      |      |      |      |      |      |
|---------------------|------------------|------|------|------|------|------|------|
| <b>11 (R1a+R2e)</b> | <b>TS1</b>       | 2.04 | 0.77 | 3.92 | 0.98 | 3.75 | 0.49 |
|                     | <b>IM</b>        | 1.66 |      | 3.83 |      | 5.64 | 0.57 |
|                     | <b>TS2-trans</b> | 1.54 | 1.00 | 2.72 | 0.29 | 4.01 | 0.54 |
|                     | <b>P-trans</b>   | 1.55 |      | 1.59 |      | 4.11 | 0.52 |
|                     | <b>TS2-cis</b>   | 1.54 | 1.00 | 2.00 | 0.73 | 6.06 | 0.83 |
|                     | <b>P-cis</b>     | 1.56 |      | 1.58 |      | 4.91 | 0.51 |
| <b>12 (R1a+R2f)</b> | <b>PC</b>        | 6.01 |      | 6.60 |      | 7.18 | 0.09 |
|                     | <b>TS1</b>       | 1.98 | 0.79 | 4.00 | 0.97 | 4.64 | 0.30 |
|                     | <b>IM</b>        | 1.63 |      | 3.89 |      | 6.23 | 0.41 |
|                     | <b>TS2-trans</b> | 1.54 | 1.00 | 1.96 | 0.77 | 4.31 | 0.32 |
|                     | <b>P-trans</b>   | 1.55 |      | 1.59 |      | 5.42 | 0.29 |
|                     | <b>TS2-cis</b>   | 1.56 | 1.00 | 2.00 | 0.76 | 5.00 | 0.24 |
|                     | <b>P-cis</b>     | 1.53 |      | 1.61 |      | 5.23 | 0.52 |
| <b>13 (R1a+R1a)</b> | <b>PC</b>        | 3.31 |      | 4.61 |      | 2.03 | 0.52 |
|                     | <b>TS1</b>       | 2.07 | 0.75 | 3.95 | 0.97 | 1.10 | 0.51 |
|                     | <b>IM</b>        | 1.66 |      | 3.85 |      | 0.74 | 0.52 |
|                     | <b>TS2-trans</b> | 1.54 | 1.00 | 2.10 | 0.70 | 2.70 | 0.50 |
|                     | <b>P-trans</b>   | 1.55 |      | 1.61 |      | 1.00 | 0.48 |
|                     | <b>TS2-cis</b>   | 1.54 | 1.00 | 2.02 | 0.75 | 5.72 | 0.51 |
|                     | <b>P-cis</b>     | 1.55 |      | 1.62 |      | 4.12 | 0.59 |
| <b>14 (R1b+R1b)</b> | <b>PC</b>        | 3.31 |      | 4.59 |      | 1.81 | 0.51 |
|                     | <b>TS1</b>       | 2.07 | 0.75 | 3.94 | 0.98 | 1.70 | 0.50 |
|                     | <b>IM</b>        | 1.66 |      | 3.85 |      | 0.79 | 0.48 |
|                     | <b>TS2-trans</b> | 1.54 | 1.00 | 2.47 | 0.46 | 3.04 | 0.50 |
|                     | <b>P-trans</b>   | 1.55 |      | 1.60 |      | 0.86 | 0.52 |
|                     | <b>TS2-cis</b>   | 1.54 | 1.00 | 2.05 | 0.73 | 6.12 | 0.52 |
|                     | <b>P-cis</b>     | 1.55 |      | 1.61 |      | 4.83 | 0.66 |
| <b>15 (R1c+R1c)</b> | <b>PC</b>        | 3.30 |      | 4.60 |      | 2.74 | 0.52 |
|                     | <b>TS1</b>       | 2.08 | 0.75 | 3.96 | 0.97 | 1.73 | 0.49 |
|                     | <b>IM</b>        | 1.66 |      | 3.85 |      | 1.71 | 0.52 |
|                     | <b>TS2-trans</b> | 1.54 | 1.00 | 2.06 | 0.72 | 7.03 | 0.50 |
|                     | <b>P-trans</b>   | 1.55 |      | 1.61 |      | 5.09 | 0.45 |
|                     | <b>TS2-cis</b>   | 1.54 | 1.00 | 2.03 | 0.75 | 9.69 | 0.53 |
|                     | <b>P-cis</b>     | 1.55 |      | 1.62 |      | 7.88 | 0.59 |
| <b>16 (R1f+R1f)</b> | <b>PC</b>        | 3.34 |      | 4.67 |      | 2.16 | 0.50 |
|                     | <b>TS1</b>       | 2.06 | 0.77 | 3.95 | 0.97 | 1.38 | 0.51 |
|                     | <b>IM</b>        | 1.67 |      | 3.85 |      | 1.04 | 0.51 |
|                     | <b>TS2-trans</b> | 1.54 | 1.00 | 2.11 | 0.69 | 1.30 | 0.50 |
|                     | <b>P-trans</b>   | 1.55 |      | 1.61 |      | 1.24 | 0.38 |
|                     | <b>TS2-cis</b>   | 1.54 | 1.00 | 2.03 | 0.75 | 5.19 | 0.62 |
|                     | <b>P-cis</b>     | 1.55 |      | 1.62 |      | 4.28 | 0.73 |

<sup>a</sup> The indexes *l* were calculated according to the equation<sup>1</sup>:

$l_{X-Y} = 1 - (r_{X-Y}^{TS} - r_{X-Y}^P) / r_{X-Y}^P$ , where  $r_{X-Y}^{TS}$  is the distance between the atoms X

and Y in the transition state and  $r_{X-Y}^P$  is the corresponding distance in product. The charge transfer (t) was calculated according to the expression<sup>2</sup>:  $t = -\sum q_A$ , where  $q_A$  is the charge on atom A, and the summation is over all of the neutral molecule.

- [1] R. Jasiński, M. Kwiatkowska, A. Barański, J. Mol. Struct: Theo. Chem. 2009, **910**, 80.  
 [2] G. Leroy, M. Sana, L. A. Burke, M. T. Nguyen, Quantum Theory Chem. React., 1980, **1**, 91.

**Table S2 The enthalpies at 298 K in solvent (CH<sub>3</sub>CN) for the pr-reaction complexes, transition states, intermediates, and products along the cycloaddition pathways. All values are given in kcal/mol.**

| Reactions           | R1+R2 | PC   | TS1  | IM   | TS2-trans | P-trans | TS2-cis | P-cis |
|---------------------|-------|------|------|------|-----------|---------|---------|-------|
| <b>1 (R1a+R2a)</b>  | 0     | 1.6  | 3.9  | -2.3 | 1.1       | -5.5    | 4.0     | -2.5  |
| <b>2 (R1b+R2a)</b>  | 0     | -0.1 | 5.0  | -1.3 | 1.6       | -5.9    | 4.4     | -3.0  |
| <b>3 (R1c+R2a)</b>  | 0     | 0.0  | 1.9  | -4.3 | -0.1      | -4.2    | 3.0     | -1.2  |
| <b>4 (R1d+R2a)</b>  | 0     | 0.0  | 21.5 | 16.3 | 16.6      | -9.6    | 18.4    | -6.1  |
| <b>5 (R1e+R2a)</b>  | 0     | -1.5 | 1.0  | -5.2 | -0.7      | -3.9    | 2.6     | -0.9  |
| <b>6 (R1f+R2a)</b>  | 0     | 2.3  | 5.5  | -0.5 | 1.5       | -5.2    | 4.4     | -2.3  |
| <b>7 (R1g+R2a)</b>  | 0     | -1.6 | 9.7  | 0.4  | 3.5       | -3.6    | 6.8     | -0.5  |
| <b>8 (R1a+R2b)</b>  | 0     | 1.7  | 12.1 | 5.4  | 6.3       | 0.7     | 12.0    | 7.8   |
| <b>9 (R1a+R2c)</b>  | 0     | 1.0  | 7.3  | 2.0  | 5.0       | -4.0    | 7.4     | -0.5  |
| <b>10 (R1a+R2d)</b> | 0     | 1.0  | 19.3 | 11.5 | 16.6      | -3.3    | 18.5    | -4.5  |
| <b>11 (R1a+R2e)</b> | 0     | -6.2 | 20.0 | 17.0 | 16.4      | 9.6     | 18.3    | 13.1  |
| <b>12 (R1a+R2f)</b> | 0     | 1.1  | 25.9 | 22.9 | 23.6      | 16.5    | 29.1    | 23.4  |
| <b>13 (R1a+R1a)</b> | 0     | 3.8  | 10.7 | 1.9  | 2.9       | -2.0    | 9.4     | 5.2   |
| <b>14 (R1b+R1b)</b> | 0     | 4.9  | 12.5 | 4.7  | 6.1       | 2.8     | 12.2    | 10.7  |
| <b>15 (R1c+R1c)</b> | 0     | 5.0  | 12.8 | 5.2  | 5.2       | 1.0     | 11.5    | 6.9   |
| <b>16 (R1f+R1f)</b> | 0     | 4.8  | 13.1 | 5.7  | 6.2       | 1.7     | 12.7    | 8.8   |

**Cartesian Coordinates (Å), SCF Energies, Enthalpies, and Free Energies at 298 K and 1 atm and NBO charges for the main Optimized Structures**

## TS1-1

B3LYP SCF energy: -693.503216 a.u.

B3LYP enthalpy: -693.485787 a.u.

B3LYP free energy: -693.550745 a.u.

### Cartesian coordinate

|   |              |              |              |
|---|--------------|--------------|--------------|
| C | -0.00000182  | -0.00000811  | -0.000004365 |
| H | 0.000001148  | -0.000003414 | -0.000001749 |
| C | -0.00000562  | -0.000004659 | -0.000002845 |
| H | -0.000001661 | -0.000002796 | 0.000008620  |
| C | -0.000003001 | -0.000002857 | -0.000002135 |
| O | 0.000002522  | -0.000002426 | -0.000003266 |
| C | 0.000000001  | -0.000004579 | 0.000002042  |
| H | -0.000000587 | -0.000003664 | 0.000004152  |
| H | 0.000000024  | -0.000006218 | -0.000000319 |
| H | 0.000000445  | -0.000001443 | 0.000000147  |
| H | -0.000003328 | -0.000002873 | 0.000002808  |
| C | 0.000000290  | 0.000002784  | 0.000002987  |
| H | 0.000000934  | 0.000000562  | 0.000000431  |
| C | 0.000002756  | 0.000003699  | 0.000001374  |
| H | -0.000001210 | 0.000002673  | -0.000002257 |
| C | -0.000001067 | -0.000001762 | -0.000000799 |
| O | -0.000001027 | 0.000001701  | 0.000003900  |
| C | 0.000000534  | 0.000000405  | -0.000000877 |
| C | -0.000000727 | 0.000002407  | -0.000001306 |
| C | 0.000000940  | 0.000001382  | 0.000001445  |
| C | 0.000002152  | 0.000001121  | -0.000003461 |
| H | 0.000002203  | 0.000001005  | -0.000003662 |
| C | -0.000000839 | 0.000001403  | 0.000001752  |
| H | -0.000001473 | 0.000001095  | 0.000003925  |
| C | 0.000000022  | 0.000001168  | -0.000002235 |
| H | 0.000001228  | 0.000001441  | -0.000005794 |
| H | -0.000000880 | 0.000001495  | 0.000002164  |
| H | 0.000000349  | 0.000001346  | -0.000002613 |
| C | -0.000003055 | -0.000000971 | -0.000002401 |
| H | 0.000003388  | 0.000005517  | 0.000008399  |
| H | 0.000000943  | 0.000003073  | -0.000002968 |
| H | -0.000000279 | 0.000004198  | -0.000001096 |

### NBO Charges

C 1 -0.13022

H 2 0.10401

C 3 -0.11235

H 4 0.08741

C 5 0.24613

O 6 -0.27891

C 7 -0.32572

H 8 0.09256

H 9 0.10307

H 10 0.10375

H 11 0.10621

C 12 -0.01961

H 13 0.10606

C 14 -0.11685

H 15 0.08726

C 16 0.24037

O 17 -0.26432

C 18 -0.04675

C 19 -0.08689

C 20 -0.07580

C 21 -0.11520

H 22 0.10083

C 23 -0.11604

H 24 0.11381

C 25 -0.09734

H 26 0.09585

H 27 0.09555

H 28 0.09445

C 29 -0.29681

H 30 0.10614

H 31 0.10007

H 32 0.09928

## IM-1

B3LYP SCF energy: -693.511163 a.u.

B3LYP enthalpy: -693.493835 a.u.

B3LYP free energy: -693.558230 a.u.

### Cartesian coordinates

C -0.000012398 -0.000003881 -0.000012960

H -0.000000707 0.000006143 0.000008069

|   |              |              |              |
|---|--------------|--------------|--------------|
| C | 0.000010867  | 0.000009252  | -0.000003635 |
| H | -0.000003965 | -0.000000914 | -0.000009460 |
| C | -0.000000913 | 0.000021740  | -0.000013080 |
| O | 0.000003083  | -0.000006114 | 0.000018035  |
| C | -0.000006023 | 0.000012368  | -0.000003373 |
| H | 0.000008263  | 0.000002757  | -0.000007016 |
| H | 0.000000160  | 0.000010189  | 0.000000856  |
| H | -0.000002161 | -0.000001586 | -0.000000812 |
| H | 0.000004349  | 0.000010575  | -0.000004083 |
| C | 0.000018760  | -0.000003921 | 0.000004048  |
| H | -0.000000480 | -0.000001966 | -0.000003059 |
| C | -0.000005188 | -0.000005933 | -0.000006917 |
| H | 0.000000781  | 0.000005275  | 0.000010775  |
| C | -0.000010270 | -0.000007445 | 0.000010882  |
| O | -0.000003241 | 0.000006600  | -0.000017256 |
| C | 0.000019506  | -0.000022039 | -0.000004411 |
| C | -0.000004088 | 0.000005280  | 0.000006299  |
| C | -0.000009508 | -0.000002167 | -0.000010834 |
| C | -0.000000449 | 0.000005334  | 0.000006935  |
| H | 0.000001708  | -0.000004754 | 0.000010056  |
| C | 0.000004962  | -0.000006078 | -0.000004403 |
| H | 0.000002456  | -0.000002566 | -0.000011553 |
| C | -0.000003352 | 0.000001524  | 0.000000483  |
| H | -0.000001572 | -0.000003361 | 0.000011491  |
| H | 0.000002885  | 0.000000794  | -0.000009632 |
| H | 0.000001319  | -0.000001086 | 0.000002079  |
| C | -0.000008244 | 0.000000379  | 0.000007346  |
| H | -0.000007002 | -0.000005574 | 0.000005110  |
| H | -0.000000410 | -0.000005276 | 0.000014610  |
| H | 0.000000874  | -0.000013547 | 0.000005410  |

#### NBO Charges

|   |    |          |
|---|----|----------|
| C | 1  | -0.41571 |
| H | 2  | 0.21260  |
| C | 3  | -0.26449 |
| H | 4  | 0.17132  |
| C | 5  | 0.39675  |
| O | 6  | -0.67329 |
| C | 7  | -0.64135 |
| H | 8  | 0.18488  |
| H | 9  | 0.20001  |
| H | 10 | 0.20003  |
| H | 11 | 0.21702  |
| C | 12 | -0.24252 |
| H | 13 | 0.20564  |

|   |    |          |
|---|----|----------|
| C | 14 | -0.28974 |
| H | 15 | 0.17439  |
| C | 16 | 0.37316  |
| O | 17 | -0.70234 |
| C | 18 | -0.06981 |
| C | 19 | -0.19584 |
| C | 20 | -0.19043 |
| C | 21 | -0.22170 |
| H | 22 | 0.20430  |
| C | 23 | -0.21703 |
| H | 24 | 0.22948  |
| C | 25 | -0.23140 |
| H | 26 | 0.19116  |
| H | 27 | 0.19096  |
| H | 28 | 0.19011  |
| C | 29 | -0.56792 |
| H | 30 | 0.20059  |
| H | 31 | 0.19426  |
| H | 32 | 0.18690  |

## TS2-trans-1

B3LYP SCF energy: -693.504927 a.u.

B3LYP enthalpy: -693.488372 a.u.

B3LYP free energy: -693.550208 a.u.

#### Cartesian coordinate

|   |              |              |              |
|---|--------------|--------------|--------------|
| C | 0.000013515  | 0.000001690  | -0.000000030 |
| H | -0.000001035 | 0.000000706  | 0.000001298  |
| C | -0.000021325 | -0.000033159 | -0.000004222 |
| H | 0.000005570  | 0.000005086  | -0.000002673 |
| C | 0.000020824  | 0.000035527  | 0.000043151  |
| O | -0.000014397 | -0.000017134 | -0.000017305 |
| C | -0.000010873 | 0.000019671  | 0.000005258  |
| H | 0.000007437  | 0.000007923  | 0.000004395  |
| H | 0.000014136  | -0.000007573 | -0.000008552 |
| H | -0.000005587 | -0.000011330 | 0.000008507  |
| H | -0.000000560 | -0.000001895 | 0.000000169  |
| C | 0.000000235  | -0.000016623 | 0.000007229  |
| H | -0.000001071 | 0.000000768  | -0.000000550 |
| C | 0.000026793  | 0.000036511  | 0.000004111  |
| H | -0.000002478 | -0.000010204 | 0.000006166  |
| C | -0.000029922 | -0.000021848 | -0.000027616 |
| O | 0.000004268  | 0.000012059  | 0.000007440  |
| C | 0.000012647  | 0.000000907  | 0.000001271  |

|   |             |              |              |
|---|-------------|--------------|--------------|
| C | -0.00002378 | 0.00002791   | 0.00002241   |
| C | -0.00007170 | 0.00002205   | -0.00007326  |
| C | 0.00001515  | -0.00000508  | 0.00000812   |
| H | -0.00001372 | -0.00001321  | 0.000003282  |
| C | 0.00001400  | -0.00001536  | -0.000008026 |
| H | -0.00000368 | 0.00001002   | -0.000002395 |
| C | -0.00004751 | 0.00003851   | -0.00000497  |
| H | -0.00001398 | -0.00000685  | 0.000001553  |
| H | -0.00000656 | 0.00002310   | -0.000003745 |
| H | -0.00001367 | 0.00001215   | -0.000001784 |
| C | -0.00002914 | -0.00003058  | -0.000006860 |
| H | 0.00000362  | -0.00002092  | -0.000002507 |
| H | 0.000000282 | -0.000003183 | -0.000001355 |
| H | 0.00000640  | -0.000002073 | -0.000001439 |

NBO charges

|   |    |          |
|---|----|----------|
| C | 1  | -0.19787 |
| H | 2  | 0.08981  |
| C | 3  | -0.06312 |
| H | 4  | 0.09866  |
| C | 5  | 0.26061  |
| O | 6  | -0.27854 |
| C | 7  | -0.32523 |
| H | 8  | 0.09889  |
| H | 9  | 0.10507  |
| H | 10 | 0.10193  |
| H | 11 | 0.10526  |
| C | 12 | -0.12197 |
| H | 13 | 0.10706  |
| C | 14 | -0.06316 |
| H | 15 | 0.09705  |
| C | 16 | 0.24999  |
| O | 17 | -0.23746 |
| C | 18 | -0.04824 |
| C | 19 | -0.07913 |
| C | 20 | -0.06678 |
| C | 21 | -0.11973 |
| H | 22 | 0.10267  |
| C | 23 | -0.12322 |
| H | 24 | 0.11145  |
| C | 25 | -0.08639 |
| H | 26 | 0.09527  |
| H | 27 | 0.09380  |
| H | 28 | 0.09235  |
| C | 29 | -0.28388 |

|   |    |         |
|---|----|---------|
| H | 30 | 0.09194 |
| H | 31 | 0.09322 |
| H | 32 | 0.09970 |

## TS2-cis-1

B3LYP SCF energy: -693.497148 a.u.

B3LYP enthalpy: -693.480704 a.u.

B3LYP free energy: -693.541692 a.u.

Cartesian coordinate

|   |              |              |              |
|---|--------------|--------------|--------------|
| C | 0.000014579  | -0.000004427 | -0.000000212 |
| H | 0.000004332  | -0.000002663 | 0.000002046  |
| C | 0.000025273  | 0.000013402  | -0.000005162 |
| H | -0.000000027 | 0.000004959  | 0.000000254  |
| C | -0.000035942 | 0.000015267  | 0.000032032  |
| O | 0.000020007  | -0.000006059 | -0.000013045 |
| C | 0.000008564  | -0.000000064 | 0.000005046  |
| H | -0.000002074 | 0.000000718  | 0.000003514  |
| H | -0.000001340 | -0.000002011 | 0.000003212  |
| H | -0.000000273 | 0.000000595  | 0.000001453  |
| H | 0.000000178  | -0.000000442 | 0.000003017  |
| C | 0.000000790  | -0.000026790 | 0.000003906  |
| H | -0.000000111 | 0.000001864  | -0.000001099 |
| C | -0.000043095 | 0.000002596  | -0.000035650 |
| H | -0.000001055 | -0.000002904 | -0.000002446 |
| C | -0.000000315 | 0.000015728  | 0.000033048  |
| O | 0.000003880  | -0.000012035 | -0.000014220 |
| C | -0.000007567 | -0.000005997 | -0.000005933 |
| C | 0.000002113  | 0.000005261  | -0.000003133 |
| C | 0.000002904  | -0.000003287 | 0.000002567  |
| C | -0.000002990 | 0.000006307  | -0.000001208 |
| H | 0.000000117  | 0.000002597  | 0.000000468  |
| C | 0.000000863  | -0.000001917 | 0.000002757  |
| H | 0.000000692  | -0.000004280 | 0.000000835  |
| C | 0.000005716  | 0.000004475  | 0.000001098  |
| H | 0.000000207  | 0.000005501  | 0.000000284  |
| H | 0.000001753  | -0.000001425 | 0.000001130  |
| H | 0.000000990  | 0.000003034  | 0.000000815  |
| C | 0.000002689  | -0.000004216 | -0.000006262 |
| H | -0.000001837 | -0.000000495 | -0.000002566 |
| H | 0.000000024  | 0.000000551  | -0.000003729 |
| H | 0.000000952  | -0.000003845 | -0.000002817 |

NBO charges

|   |   |          |
|---|---|----------|
| C | 1 | -0.19957 |
|---|---|----------|

|   |    |          |    |              |              |              |
|---|----|----------|----|--------------|--------------|--------------|
| H | 2  | 0.10452  | C  | 0.000001270  | -0.000002684 | -0.000000630 |
| C | 3  | -0.05698 | H  | 0.000000299  | -0.000001834 | -0.000001100 |
| H | 4  | 0.09306  | H  | 0.000001463  | -0.000001959 | 0.000002275  |
| C | 5  | 0.25657  | H  | -0.000001138 | 0.000000420  | 0.000001779  |
| O | 6  | -0.27085 | H  | -0.000001091 | -0.000001976 | -0.000002961 |
| C | 7  | -0.32672 | C  | -0.000000493 | 0.000004692  | -0.000001265 |
| H | 8  | 0.09388  | H  | 0.000000696  | 0.000001716  | -0.000000247 |
| H | 9  | 0.10044  | C  | 0.000001090  | 0.000004235  | 0.000001376  |
| H | 10 | 0.11471  | H  | -0.000000097 | 0.000000022  | 0.000001847  |
| H | 11 | 0.08838  | C  | 0.000003724  | -0.000004115 | -0.000003460 |
| C | 12 | -0.12316 | O  | -0.000001434 | 0.000006150  | -0.000008214 |
| H | 13 | 0.11477  | C  | -0.000001659 | 0.000003631  | -0.000000404 |
| C | 14 | -0.06696 | C  | 0.000002025  | 0.000001139  | 0.000002023  |
| H | 15 | 0.08982  | C  | -0.000001514 | -0.000001122 | -0.000004866 |
| C | 16 | 0.24294  | C  | 0.000000172  | 0.000002248  | 0.000004200  |
| O | 17 | -0.22232 | H  | 0.000001437  | 0.000001128  | 0.000002375  |
| C | 18 | -0.04620 | C  | -0.000001460 | -0.000001610 | -0.000003211 |
| C | 19 | -0.08065 | H  | -0.000000453 | -0.000000911 | -0.000003078 |
| C | 20 | -0.06465 | C  | 0.000000360  | -0.000003775 | -0.000000300 |
| C | 21 | -0.12219 | H  | 0.000000967  | -0.000000899 | 0.000002774  |
| H | 22 | 0.09782  | H  | -0.000001581 | -0.000002299 | -0.000002465 |
| C | 23 | -0.12325 | C  | -0.000000600 | 0.000006692  | 0.000002900  |
| H | 24 | 0.11211  | H  | 0.000002263  | 0.000002635  | 0.000001131  |
| C | 25 | -0.08440 | H  | -0.000000140 | 0.000001907  | 0.000002796  |
| H | 26 | 0.09362  | H  | 0.000000091  | 0.000004037  | 0.000000317  |
| H | 27 | 0.09389  | Cl | -0.000001129 | -0.000004747 | 0.000003081  |
| H | 28 | 0.09198  |    |              |              |              |
| C | 29 | -0.28443 |    |              |              |              |
| H | 30 | 0.09263  |    |              |              |              |
| H | 31 | 0.08891  |    |              |              |              |
| H | 32 | 0.10228  |    |              |              |              |

## TS1-2

B3LYP SCF energy: -1153.140687 a.u.

B3LYP enthalpy: -1153.121985 a.u.

B3LYP free energy: -1153.190456 a.u.

Cartesian coordinate

|   |              |              |              |
|---|--------------|--------------|--------------|
| C | -0.000001173 | -0.000001551 | 0.000000450  |
| H | 0.000000159  | -0.000002565 | 0.000001315  |
| C | -0.000001063 | -0.000003641 | -0.000001973 |
| H | 0.000000075  | -0.000001273 | -0.000002225 |
| C | -0.000001422 | 0.000001791  | -0.000002777 |
| O | 0.000000354  | -0.000005482 | 0.000008538  |

NBO charges

|   |    |          |
|---|----|----------|
| C | 1  | -0.13728 |
| H | 2  | 0.10478  |
| C | 3  | -0.10447 |
| H | 4  | 0.08760  |
| C | 5  | 0.24504  |
| O | 6  | -0.27636 |
| C | 7  | -0.32584 |
| H | 8  | 0.09287  |
| H | 9  | 0.10355  |
| H | 10 | 0.10409  |
| H | 11 | 0.10766  |
| C | 12 | -0.01468 |
| H | 13 | 0.10622  |
| C | 14 | -0.12319 |
| H | 15 | 0.08698  |
| C | 16 | 0.23969  |
| O | 17 | -0.26411 |



|    |    |          |
|----|----|----------|
| C  | 18 | -0.04753 |
| C  | 19 | -0.07768 |
| C  | 20 | -0.06506 |
| C  | 21 | -0.12774 |
| H  | 22 | 0.10280  |
| C  | 23 | -0.12868 |
| H  | 24 | 0.11737  |
| C  | 25 | -0.00271 |
| H  | 26 | 0.10537  |
| H  | 27 | 0.10525  |
| C  | 28 | -0.29721 |
| H  | 29 | 0.10598  |
| H  | 30 | 0.10075  |
| H  | 31 | 0.09993  |
| Cl | 32 | -0.02340 |

## IM-2

B3LYP SCF energy: -1153.148684 a.u.

B3LYP enthalpy: -1153.130095 a.u.

B3LYP free energy: -1153.197978 a.u.

Cartesian coordinate

|   |              |              |              |
|---|--------------|--------------|--------------|
| C | 0.000026971  | -0.000009551 | 0.000030131  |
| H | -0.000001617 | 0.000005605  | -0.000006870 |
| C | -0.000014136 | 0.000005929  | 0.000003294  |
| H | 0.000002656  | -0.000000794 | 0.000006490  |
| C | 0.000003823  | -0.000000232 | -0.000004249 |
| O | -0.000000210 | 0.000009938  | -0.000003280 |
| C | -0.000004914 | 0.000008023  | 0.000001520  |
| H | 0.000002009  | 0.000001600  | 0.000003732  |
| H | 0.000000422  | 0.000007350  | 0.000000702  |
| H | -0.000000059 | 0.000001395  | -0.000001499 |
| H | -0.000004954 | 0.000004593  | -0.000004807 |
| C | -0.000019931 | 0.000014303  | -0.000023616 |
| H | 0.000005593  | -0.000005744 | 0.000006560  |
| C | 0.000008046  | -0.000008381 | -0.000003186 |
| H | -0.000005489 | 0.000003043  | -0.000006940 |
| C | -0.000008826 | 0.000007289  | 0.000007312  |
| O | 0.000005069  | -0.000007916 | 0.000006979  |
| C | 0.000006700  | -0.000005269 | -0.000002628 |
| C | 0.000001459  | -0.000000899 | 0.000005507  |
| C | -0.000004719 | -0.000002335 | 0.000007739  |
| C | -0.000001846 | -0.000003644 | -0.000009114 |
| H | 0.000002610  | -0.000002031 | -0.000005914 |

|    |              |              |              |
|----|--------------|--------------|--------------|
| C  | 0.000003931  | -0.000000573 | 0.000002620  |
| H  | 0.000000953  | 0.000000733  | 0.000007342  |
| C  | -0.000001840 | 0.000002031  | 0.000001318  |
| H  | -0.000000450 | -0.000001837 | -0.000008474 |
| H  | 0.000000488  | 0.000000406  | 0.000006749  |
| C  | 0.000000486  | -0.000006388 | 0.000000857  |
| H  | -0.000001331 | -0.000003494 | -0.000004653 |
| H  | -0.000000245 | -0.000004278 | -0.000007424 |
| H  | -0.000000487 | -0.000008418 | -0.000005058 |
| Cl | -0.000000162 | -0.000000456 | -0.000001139 |

NBO Charges

|    |    |          |
|----|----|----------|
| C  | 1  | -0.20432 |
| H  | 2  | 0.10719  |
| C  | 3  | 0.07343  |
| H  | 4  | 0.08034  |
| C  | 5  | 0.19610  |
| O  | 6  | -0.23607 |
| C  | 7  | -0.32199 |
| H  | 8  | 0.09280  |
| H  | 9  | 0.10167  |
| H  | 10 | 0.10267  |
| H  | 11 | 0.11624  |
| C  | 12 | -0.10333 |
| H  | 13 | 0.10469  |
| C  | 14 | -0.04480 |
| H  | 15 | 0.08413  |
| C  | 16 | 0.18758  |
| O  | 17 | -0.28454 |
| C  | 18 | -0.03590 |
| C  | 19 | -0.08696 |
| C  | 20 | -0.08347 |
| C  | 21 | -0.12408 |
| H  | 22 | 0.10454  |
| C  | 23 | -0.12144 |
| H  | 24 | 0.11790  |
| C  | 25 | -0.01913 |
| H  | 26 | 0.10521  |
| H  | 27 | 0.10510  |
| C  | 28 | -0.28015 |
| H  | 29 | 0.09915  |
| H  | 30 | 0.09780  |
| H  | 31 | 0.09414  |
| Cl | 32 | -0.02450 |

## TS2-trans-2

B3LYP SCF energy: -1153.143205 a.u.

B3LYP enthalpy: -1153.125512 a.u.

B3LYP free energy: -1153.189953 a.u.

### Cartesian coordinate

|    |              |              |              |
|----|--------------|--------------|--------------|
| C  | -0.000012190 | 0.000004476  | -0.000001479 |
| H  | 0.000000035  | 0.000000417  | -0.000002442 |
| C  | 0.000022085  | -0.000042756 | 0.000009998  |
| H  | -0.000006866 | 0.000004553  | 0.000003487  |
| C  | -0.000018401 | 0.000040863  | -0.000041904 |
| O  | 0.000010022  | -0.000016506 | 0.000030776  |
| C  | 0.000005279  | -0.000000492 | 0.000010820  |
| H  | -0.000001150 | 0.000000628  | 0.000000781  |
| H  | 0.000000589  | 0.000001573  | 0.000001465  |
| H  | -0.000003269 | 0.000001452  | -0.000000558 |
| H  | -0.000000690 | -0.000000553 | -0.000001644 |
| C  | -0.000002266 | -0.000015763 | -0.000012009 |
| H  | 0.000000123  | -0.000000270 | 0.000000303  |
| C  | -0.000025865 | 0.000041792  | -0.000009188 |
| H  | 0.000001392  | -0.000011034 | -0.000006933 |
| C  | 0.000027604  | -0.000027030 | 0.000028076  |
| O  | -0.000002088 | 0.000006980  | -0.000015585 |
| C  | -0.000015278 | 0.000001239  | -0.000005132 |
| C  | 0.000005549  | 0.000004625  | -0.000001672 |
| C  | 0.000007251  | -0.000003724 | 0.000003888  |
| C  | -0.000002154 | 0.000005588  | -0.000001453 |
| H  | 0.000000323  | 0.000000359  | -0.000002704 |
| C  | 0.000002395  | -0.000000170 | 0.000003109  |
| H  | 0.000001434  | -0.000001193 | 0.000000385  |
| C  | -0.000002108 | -0.000000695 | 0.000003843  |
| H  | 0.000001056  | 0.000001999  | 0.000000064  |
| H  | 0.000002653  | 0.000000184  | 0.000003052  |
| C  | 0.000001210  | -0.000001218 | 0.000000446  |
| H  | -0.000002199 | -0.000000903 | -0.000000213 |
| H  | -0.000001127 | -0.000000752 | -0.000001398 |
| H  | -0.000001213 | -0.000001862 | -0.000001917 |
| Cl | 0.000007865  | 0.000008190  | 0.000005737  |

### NBO Charges

|   |   |          |
|---|---|----------|
| C | 1 | -0.19929 |
| H | 2 | 0.09054  |
| C | 3 | -0.05246 |
| H | 4 | 0.09801  |
| C | 5 | 0.25553  |

|    |    |          |
|----|----|----------|
| O  | 6  | -0.27648 |
| C  | 7  | -0.32495 |
| H  | 8  | 0.09863  |
| H  | 9  | 0.10498  |
| H  | 10 | 0.10258  |
| H  | 11 | 0.10569  |
| C  | 12 | -0.12215 |
| H  | 13 | 0.10710  |
| C  | 14 | -0.06384 |
| H  | 15 | 0.09705  |
| C  | 16 | 0.24569  |
| O  | 17 | -0.23573 |
| C  | 18 | -0.04773 |
| C  | 19 | -0.07078 |
| C  | 20 | -0.05753 |
| C  | 21 | -0.13190 |
| H  | 22 | 0.10567  |
| C  | 23 | -0.13534 |
| H  | 24 | 0.11447  |
| C  | 25 | 0.00872  |
| H  | 26 | 0.10525  |
| H  | 27 | 0.10382  |
| C  | 28 | -0.28397 |
| H  | 29 | 0.09246  |
| H  | 30 | 0.09345  |
| H  | 31 | 0.09985  |
| Cl | 32 | -0.02736 |

## TS2-cis-2

B3LYP SCF energy: -1153.135704a.u.

B3LYP enthalpy: -1153.117974 a.u.

B3LYP free energy: -1153.182448 a.u.

### Cartesian coordinate

|   |              |              |              |
|---|--------------|--------------|--------------|
| C | -0.000015572 | 0.000009086  | -0.000005774 |
| H | -0.000002917 | 0.000001656  | -0.000002082 |
| C | 0.000030712  | -0.000034924 | 0.000000059  |
| H | 0.000000135  | 0.000004298  | 0.000000126  |
| C | -0.000065732 | 0.000025971  | 0.000051157  |
| O | 0.000035102  | -0.000007250 | -0.000015786 |
| C | 0.000010865  | 0.000002538  | 0.000007757  |
| H | -0.000001241 | 0.000000873  | 0.000005525  |
| H | -0.000003169 | 0.000001590  | 0.000006047  |
| H | 0.000001973  | 0.000000858  | 0.000006393  |

|    |              |              |              |
|----|--------------|--------------|--------------|
| H  | 0.000000961  | 0.000000486  | -0.000000768 |
| C  | -0.000000004 | -0.000014711 | -0.000005348 |
| H  | -0.000003012 | -0.000000901 | 0.000000627  |
| C  | -0.000015799 | 0.000026554  | -0.000044397 |
| H  | 0.000001908  | -0.000011075 | 0.000001951  |
| C  | 0.000023207  | -0.000005788 | 0.000045857  |
| O  | -0.000001185 | -0.000010153 | -0.000022440 |
| C  | -0.000015170 | -0.000005809 | -0.000007304 |
| C  | 0.000005502  | 0.000004837  | -0.000006538 |
| C  | 0.000004338  | -0.000006024 | 0.000003479  |
| C  | 0.000000247  | 0.000007419  | -0.000002473 |
| H  | 0.000000224  | 0.000001837  | -0.000000650 |
| C  | 0.000003871  | -0.000003818 | 0.000003408  |
| H  | 0.000001531  | -0.000005269 | 0.000000871  |
| C  | -0.000004693 | 0.000000747  | 0.000001265  |
| H  | 0.000001106  | 0.000005122  | -0.000001016 |
| H  | 0.000001543  | -0.000001529 | 0.000000629  |
| C  | -0.000000555 | 0.000004370  | -0.000008184 |
| H  | -0.000001964 | 0.000000720  | -0.000003097 |
| H  | -0.000001868 | 0.000001436  | -0.000005565 |
| H  | -0.000000624 | -0.000003068 | -0.000004930 |
| Cl | 0.000010276  | 0.000009921  | 0.000001200  |

NBO Charges

|   |    |          |
|---|----|----------|
| C | 1  | -0.20074 |
| H | 2  | 0.10489  |
| C | 3  | -0.04640 |
| H | 4  | 0.09251  |
| C | 5  | 0.25196  |
| O | 6  | -0.26865 |
| C | 7  | -0.32621 |
| H | 8  | 0.09380  |
| H | 9  | 0.10113  |
| H | 10 | 0.11388  |
| H | 11 | 0.08889  |
| C | 12 | -0.12338 |
| H | 13 | 0.11518  |
| C | 14 | -0.06846 |
| H | 15 | 0.08977  |
| C | 16 | 0.23902  |
| O | 17 | -0.22079 |
| C | 18 | -0.04562 |
| C | 19 | -0.07236 |
| C | 20 | -0.05539 |
| C | 21 | -0.13421 |

|    |    |          |
|----|----|----------|
| H  | 22 | 0.10088  |
| C  | 23 | -0.13548 |
| H  | 24 | 0.11512  |
| C  | 25 | 0.01119  |
| H  | 26 | 0.10366  |
| H  | 27 | 0.10394  |
| C  | 28 | -0.28455 |
| H  | 29 | 0.09319  |
| H  | 30 | 0.08912  |
| H  | 31 | 0.10242  |
| Cl | 32 | -0.02828 |

### TS1-3

B3LYP SCF energy: -808.026278 a.u.

B3LYP enthalpy: -808.006164 a.u.

B3LYP free energy: -808.077717 a.u.

Cartesian coordinate

|   |              |              |              |
|---|--------------|--------------|--------------|
| C | 0.000006378  | 0.000004150  | -0.000000922 |
| H | -0.000006347 | -0.000002016 | -0.000001849 |
| C | -0.000000911 | 0.000002208  | -0.000000567 |
| H | 0.000000347  | -0.000001455 | -0.000000225 |
| C | 0.000000442  | 0.000000723  | 0.000004572  |
| O | -0.000000719 | 0.000003204  | -0.000001565 |
| C | 0.000000304  | 0.000000845  | -0.000000631 |
| H | -0.000000495 | -0.000000265 | -0.000000046 |
| H | -0.000000410 | 0.000002387  | -0.000000706 |
| H | 0.000000410  | 0.000001683  | 0.000001855  |
| H | -0.000000214 | -0.000000556 | -0.000000965 |
| C | 0.000005368  | 0.000006908  | 0.000000973  |
| H | -0.000000999 | -0.000003956 | 0.000002437  |
| C | -0.000000361 | -0.000001619 | 0.000002889  |
| H | -0.000000005 | -0.000000677 | 0.000001218  |
| C | 0.000000940  | 0.000000609  | -0.000001252 |
| O | -0.000001463 | -0.000002121 | 0.000001041  |
| C | -0.000000427 | -0.000001423 | -0.000000151 |
| C | 0.000001047  | 0.000001387  | 0.000000202  |
| C | 0.000000211  | -0.000001787 | -0.000001161 |
| C | -0.000000143 | 0.000000611  | 0.000000014  |
| H | 0.000000855  | 0.000001017  | 0.000001046  |
| C | 0.000000182  | -0.000001182 | -0.000002002 |
| H | -0.000000371 | -0.000002362 | -0.000002079 |
| C | -0.000000727 | -0.000001432 | -0.000001302 |
| H | 0.000000080  | 0.000001473  | 0.000000597  |

|   |              |              |              |
|---|--------------|--------------|--------------|
| H | -0.00000142  | -0.000002475 | -0.000002561 |
| C | -0.000000930 | -0.000001517 | 0.000002871  |
| H | -0.000000674 | -0.000001241 | 0.000000990  |
| H | 0.000001995  | 0.000001361  | 0.000002947  |
| H | 0.000000499  | 0.000000171  | 0.000004534  |
| O | 0.000000044  | 0.000001771  | -0.000000455 |
| C | -0.000001383 | -0.000001717 | -0.000002269 |
| H | -0.000000842 | -0.000000324 | -0.000002359 |
| H | -0.000001187 | -0.000000582 | -0.000003182 |
| H | -0.000000354 | -0.000001801 | -0.000001935 |

NBO Charges

|   |    |          |
|---|----|----------|
| C | 1  | -0.12697 |
| H | 2  | 0.10361  |
| C | 3  | -0.11447 |
| H | 4  | 0.08723  |
| C | 5  | 0.24718  |
| O | 6  | -0.27870 |
| C | 7  | -0.32576 |
| H | 8  | 0.09240  |
| H | 9  | 0.10297  |
| H | 10 | 0.10360  |
| H | 11 | 0.10660  |
| C | 12 | -0.01706 |
| H | 13 | 0.10561  |
| C | 14 | -0.11868 |
| H | 15 | 0.08681  |
| C | 16 | 0.24381  |
| O | 17 | -0.27217 |
| C | 18 | -0.06214 |
| C | 19 | -0.07751 |
| C | 20 | -0.06306 |
| C | 21 | -0.13464 |
| H | 22 | 0.10161  |
| C | 23 | -0.15705 |
| H | 24 | 0.11465  |
| C | 25 | 0.16502  |
| H | 26 | 0.10312  |
| H | 27 | 0.09972  |
| C | 28 | -0.29744 |
| H | 29 | 0.10670  |
| H | 30 | 0.09986  |
| H | 31 | 0.09914  |
| O | 32 | -0.27634 |
| C | 33 | -0.10183 |

|   |    |         |
|---|----|---------|
| H | 34 | 0.08953 |
| H | 35 | 0.08251 |
| H | 36 | 0.08213 |

### IM-3

B3LYP SCF energy: -808.034258 a.u.

B3LYP enthalpy: -808.014314a.u.

B3LYP free energy: -808.084654 a.u.

Cartesian coordinate

|   |              |              |              |
|---|--------------|--------------|--------------|
| C | -0.000018754 | 0.000012067  | -0.000028821 |
| H | 0.000000643  | 0.000000055  | 0.000011795  |
| C | 0.000013176  | -0.000020441 | 0.000024502  |
| H | 0.000003124  | -0.000003731 | -0.000003322 |
| C | -0.000002416 | 0.000035787  | -0.000099364 |
| O | -0.000004886 | -0.000011255 | 0.000046264  |
| C | 0.000000067  | -0.000023024 | 0.000023507  |
| H | -0.000003741 | -0.000006810 | -0.000002554 |
| H | 0.000007638  | -0.000006761 | 0.000004425  |
| H | -0.000004876 | 0.000003813  | -0.000001927 |
| H | 0.000001326  | -0.000006533 | 0.000007029  |
| C | 0.000014690  | -0.000011737 | 0.000026855  |
| H | -0.000003397 | -0.000001042 | -0.000009665 |
| C | -0.000005277 | 0.000006996  | 0.000003045  |
| H | 0.000004001  | -0.000003428 | 0.000008289  |
| C | 0.000000600  | 0.000013624  | -0.000033587 |
| O | 0.000000713  | -0.000011057 | 0.000007686  |
| C | -0.000008054 | 0.000007100  | 0.000009293  |
| C | 0.000000901  | -0.000003592 | 0.000003757  |
| C | 0.000012985  | 0.000007884  | -0.000004883 |
| C | -0.000003175 | 0.000000136  | 0.000001072  |
| H | -0.000002010 | 0.000000521  | 0.000004030  |
| C | -0.000000033 | -0.000004157 | 0.000000660  |
| H | -0.000001892 | -0.000000461 | -0.000003630 |
| C | -0.000002318 | -0.000000108 | -0.000009555 |
| H | 0.000000871  | 0.000002251  | 0.000003615  |
| H | 0.000002538  | 0.000002103  | -0.000003710 |
| C | -0.000003940 | 0.000004859  | -0.000002250 |
| H | 0.000004451  | -0.000000219 | 0.000002362  |
| H | 0.000001221  | 0.000003535  | 0.000008398  |
| H | -0.000002281 | 0.000004803  | -0.000001223 |
| O | 0.000007726  | 0.000005400  | 0.000017166  |
| C | -0.000005221 | 0.000005072  | -0.000009682 |
| H | -0.000005104 | 0.000003368  | 0.000000553  |

H -0.00000630 -0.000003244 0.000004559  
H 0.000001335 -0.000001770 -0.000004689

NBO Charges

C 1 -0.19989  
H 2 0.10651  
C 3 0.04560  
H 4 0.08051  
C 5 0.19663  
O 6 -0.24944  
C 7 -0.32151  
H 8 0.09214  
H 9 0.10058  
H 10 0.10167  
H 11 0.11350  
C 12 -0.10706  
H 13 0.10490  
C 14 -0.02033  
H 15 0.08313  
C 16 0.19070  
O 17 -0.27882  
C 18 -0.05088  
C 19 -0.08452  
C 20 -0.08034  
C 21 -0.13064  
H 22 0.10274  
C 23 -0.15172  
H 24 0.11519  
C 25 0.15349  
H 26 0.10299  
H 27 0.09955  
C 28 -0.27956  
H 29 0.09969  
H 30 0.09749  
H 31 0.09348  
O 32 -0.27789  
C 33 -0.10180  
H 34 0.08954  
H 35 0.08227  
H 36 0.08210

Cartesian coordinate

C -0.000003175 0.000000497 -0.000002226  
H -0.000002093 0.000000356 -0.000001489  
C 0.000005189 0.000010249 -0.000003145  
H -0.000001745 0.000001338 0.000000212  
C -0.000006047 -0.000010756 -0.000012286  
O 0.000002369 0.000003916 0.000008126  
C -0.000004710 0.000005858 -0.000000053  
H 0.000004125 0.000009663 0.000010991  
H 0.000007433 -0.000003376 -0.000004805  
H -0.000008471 -0.000006995 0.000006097  
H 0.000000357 -0.000000761 -0.000002982  
C 0.000000510 0.000001851 -0.000009423  
H -0.000000282 0.000000183 -0.000001490  
C -0.000004876 -0.000009411 -0.000000575  
H -0.000000532 0.000000881 -0.000000704  
C 0.000000682 0.000012438 0.000006321  
O -0.000000148 -0.000004018 -0.000010546  
C -0.000001639 0.000000167 -0.000002224  
C 0.000001181 -0.000003162 0.000000736  
C 0.000000134 0.000002293 -0.000000183  
C -0.000000422 -0.000002081 0.000002520  
H 0.000000945 -0.000000982 0.000001145  
C -0.000001239 0.000001253 0.000002064  
H -0.000000426 0.000001423 -0.000000699  
C 0.000002171 -0.000000293 0.000004774  
H 0.000000335 -0.000001042 0.000002073  
H 0.000000430 0.000001009 0.000000583  
C 0.000001718 -0.000001642 -0.000005960  
H 0.000000355 -0.000000375 -0.000003402  
H 0.000001207 -0.000001313 -0.000002792  
H 0.000001362 -0.000000081 -0.000002975  
O 0.000000829 -0.000001187 0.000003975  
C 0.000001839 -0.000000318 0.000009621  
H 0.000001212 -0.000001449 0.000003198  
H 0.000001576 -0.000002228 0.000001535  
H -0.000000155 -0.000001906 0.000003986

NBO Charges

C 1 -0.19688  
H 2 0.08996  
C 3 -0.05220  
H 4 0.10451  
C 5 0.38765

**TS2-trans-3**

B3LYP SCF energy: -808.027084 a.u.

B3LYP enthalpy: -808.007961a.u.

B3LYP free energy: -808.075552 a.u.

|   |    |          |   |              |              |              |
|---|----|----------|---|--------------|--------------|--------------|
| O | 6  | -0.30683 | H | 0.000002477  | -0.000004377 | 0.000009882  |
| H | 7  | 0.10314  | H | 0.000001212  | 0.000003101  | -0.000003534 |
| C | 8  | -0.12321 | C | 0.000001260  | -0.000004884 | -0.000008329 |
| H | 9  | 0.10723  | H | 0.000000257  | -0.000003523 | -0.000003409 |
| C | 10 | -0.05696 | C | -0.000006654 | 0.000010616  | -0.000009469 |
| H | 11 | 0.09616  | H | 0.000001523  | 0.000001287  | -0.000002726 |
| C | 12 | 0.24429  | C | 0.000006501  | -0.000004703 | -0.000004050 |
| O | 13 | -0.23489 | O | -0.000002570 | -0.000014233 | -0.000004978 |
| C | 14 | -0.04663 | C | -0.000004496 | -0.000001846 | -0.000001392 |
| C | 15 | -0.07985 | C | 0.000001555  | 0.000007593  | -0.000000130 |
| C | 16 | -0.06806 | C | 0.000001223  | -0.000005883 | 0.000000107  |
| C | 17 | -0.11964 | C | 0.000000262  | 0.000009256  | 0.000002724  |
| H | 18 | 0.10274  | H | 0.000000123  | 0.000004406  | 0.000000028  |
| C | 19 | -0.12286 | C | -0.000001345 | -0.000002534 | 0.000001754  |
| H | 20 | 0.11210  | H | -0.000000469 | -0.000005188 | -0.000001110 |
| C | 21 | -0.08938 | C | 0.000000761  | 0.000001950  | 0.000002863  |
| H | 22 | 0.09506  | H | 0.000000485  | 0.000006498  | 0.000001833  |
| H | 23 | 0.09400  | H | -0.000000266 | -0.000003073 | 0.000000819  |
| H | 24 | 0.09255  | C | 0.000002322  | -0.000000066 | -0.000018476 |
| C | 25 | -0.28443 | H | 0.000001531  | -0.000000782 | -0.000008744 |
| H | 26 | 0.09183  | H | 0.000001622  | 0.000002065  | -0.000008268 |
| H | 27 | 0.09265  | H | 0.000000988  | -0.000001599 | -0.000008409 |
| H | 28 | 0.10059  | O | 0.000000822  | 0.000013814  | 0.000007554  |
| O | 29 | -0.28179 | C | -0.000000765 | 0.000001527  | 0.000004084  |
| C | 30 | -0.10517 | H | -0.000000680 | 0.000002594  | 0.000003590  |
| H | 31 | 0.08314  | H | -0.000000072 | 0.000000347  | 0.000004871  |
| H | 32 | 0.08629  | H | -0.000000442 | 0.000000099  | 0.000001117  |
| H | 33 | 0.08486  |   |              |              |              |

#### NBO Charges

|   |    |          |
|---|----|----------|
| C | 1  | -0.19821 |
| H | 2  | 0.10457  |
| C | 3  | -0.06598 |
| H | 4  | 0.09349  |
| C | 5  | 0.26276  |
| O | 6  | -0.27130 |
| C | 7  | -0.32753 |
| H | 8  | 0.09405  |
| H | 9  | 0.10045  |
| H | 10 | 0.11531  |
| H | 11 | 0.08821  |
| C | 12 | -0.12177 |
| H | 13 | 0.11450  |
| C | 14 | -0.07101 |
| H | 15 | 0.08867  |
| C | 16 | 0.25232  |

## TS2-cis-3

B3LYP SCF energy: -808.019085 a.u.

B3LYP enthalpy: -807.999964 a.u.

B3LYP free energy: -808.067312 a.u.

#### Cartesian coordinate

|   |              |              |              |
|---|--------------|--------------|--------------|
| C | -0.000000762 | 0.000003378  | -0.000006521 |
| H | 0.000000509  | -0.000000534 | -0.000002102 |
| C | 0.000007325  | -0.000007961 | 0.000001791  |
| H | -0.000001074 | 0.000004884  | 0.000001794  |
| C | -0.000003581 | -0.000000852 | 0.000012228  |
| O | -0.000000561 | -0.000010806 | 0.000007480  |
| C | -0.000005798 | -0.000005340 | 0.000012578  |
| H | 0.000000578  | 0.000001597  | 0.000003731  |
| H | -0.000003799 | 0.000003174  | 0.000010818  |

O 17 -0.22997  
 C 18 -0.06416  
 C 19 -0.06974  
 C 20 -0.04591  
 C 21 -0.14385  
 H 22 0.09856  
 C 23 -0.16666  
 H 24 0.11218  
 C 25 0.17945  
 H 26 0.10123  
 H 27 0.09825  
 C 28 -0.28430  
 H 29 0.09249  
 H 30 0.08892  
 H 31 0.10217  
 O 32 -0.27638  
 C 33 -0.10109  
 H 34 0.08770  
 H 35 0.08159  
 H 36 0.08100

C -0.00000506 0.00000147 0.000001502  
 C 0.00000043 -0.000002091 0.000000670  
 C 0.000000287 -0.000000139 0.0000002146  
 C -0.000000631 -0.000002361 -0.000000100  
 H -0.000001414 -0.000001088 -0.000000214  
 C -0.000000567 0.000000241 0.000001297  
 H 0.000000017 0.000002980 0.0000002034  
 C -0.000000185 -0.000003230 0.000000524  
 H 0.000000435 -0.000003102 -0.000000150  
 H -0.000000174 0.000000856 0.0000002855  
 C -0.000000499 0.000000566 -0.0000003429  
 H 0.000000557 0.000001016 -0.0000003211  
 H -0.000000834 -0.000001450 -0.0000002789  
 H -0.000000615 0.000001149 -0.0000004823  
 N 0.000003194 0.000007747 0.000008095  
 O -0.000000493 -0.000002992 -0.000001501  
 O 0.000000949 -0.000008454 -0.000000588

NBO Charges

C 1 -0.16935  
 H 2 0.10841  
 C 3 -0.06252  
 H 4 0.08818  
 C 5 0.23456  
 O 6 -0.26843  
 C 7 -0.32563  
 H 8 0.09411  
 H 9 0.10498  
 H 10 0.10523  
 H 11 0.11369  
 C 12 -0.03593  
 H 13 0.10931  
 C 14 -0.12732  
 H 15 0.09036  
 C 16 0.22245  
 O 17 -0.25676  
 C 18 -0.02333  
 C 19 -0.09077  
 C 20 -0.08027  
 C 21 -0.09130  
 H 22 0.10255  
 C 23 -0.09791  
 H 24 0.11749  
 C 25 0.04508  
 H 26 0.11517

**TS1-4**

B3LYP SCF energy: -898.082278 a.u.

B3LYP enthalpy: -898.062357 a.u.

B3LYP free energy: -898.133710 a.u.

Cartesian coordinate

C 0.000009496 0.000008518 0.000000068  
 H 0.000002541 0.000001496 0.000001400  
 C -0.000005901 0.000002808 0.000001840  
 H -0.000000943 -0.000000840 0.000000204  
 C 0.000001095 -0.000003363 0.000003537  
 O -0.000000144 -0.000001719 -0.000002904  
 C 0.000000045 0.000000297 -0.000000488  
 H -0.000000313 0.000002126 0.000000100  
 H -0.000000111 0.000000976 -0.000000502  
 H -0.000000089 0.000001166 -0.000000843  
 H -0.000000486 0.000002638 0.000003528  
 C -0.000010327 -0.000009866 0.000001499  
 H 0.000000093 0.000003441 -0.000003381  
 C 0.000006006 -0.000005144 -0.000003294  
 H 0.000001582 0.000002251 -0.000002303  
 C 0.000000625 0.000005289 -0.000006876  
 O -0.000002735 0.000000132 0.000006097

|   |    |          |
|---|----|----------|
| H | 27 | 0.11523  |
| C | 28 | -0.29408 |
| H | 29 | 0.10401  |
| H | 30 | 0.10359  |
| H | 31 | 0.10073  |
| N | 32 | 0.24613  |
| O | 33 | -0.19718 |
| O | 34 | -0.20046 |

|   |  |              |              |              |
|---|--|--------------|--------------|--------------|
| H |  | 0.000000339  | -0.000001657 | 0.000002010  |
| H |  | 0.000000994  | -0.000001332 | 0.000001909  |
| N |  | 0.000002500  | 0.000007063  | 0.000014460  |
| O |  | -0.000005381 | 0.000000460  | -0.000007163 |
| O |  | -0.000002644 | -0.000001688 | -0.000006673 |

NBO Charges

|   |    |          |
|---|----|----------|
| C | 1  | -0.21278 |
| H | 2  | 0.09556  |
| C | 3  | 0.06516  |
| H | 4  | 0.09176  |
| C | 5  | 0.21226  |
| O | 6  | -0.24343 |
| C | 7  | -0.32202 |
| H | 8  | 0.09697  |
| H | 9  | 0.10548  |
| H | 10 | 0.10246  |
| H | 11 | 0.10705  |
| C | 12 | -0.12597 |
| H | 13 | 0.10618  |
| C | 14 | -0.06871 |
| H | 15 | 0.09539  |
| C | 16 | 0.20100  |
| O | 17 | -0.25659 |
| C | 18 | -0.01632 |
| C | 19 | -0.09161 |
| C | 20 | -0.08559 |
| C | 21 | -0.09378 |
| H | 22 | 0.10830  |
| C | 23 | -0.09834 |
| H | 24 | 0.11792  |
| C | 25 | 0.03666  |
| H | 26 | 0.11581  |
| H | 27 | 0.11478  |
| C | 28 | -0.28374 |
| H | 29 | 0.09332  |
| H | 30 | 0.09347  |
| H | 31 | 0.10110  |
| N | 32 | 0.24324  |
| O | 33 | -0.20245 |
| O | 34 | -0.20251 |

## TS2-trans-4

B3LYP SCF energy: -898.086536 a.u.

B3LYP enthalpy: -898.067370 a.u.

B3LYP free energy: -898.136014 a.u.

Cartesian coordinate

|   |  |              |              |              |
|---|--|--------------|--------------|--------------|
| C |  | -0.000003639 | -0.000000050 | -0.000001421 |
| H |  | 0.000001970  | -0.000001202 | 0.000001258  |
| C |  | -0.000003093 | -0.000005815 | 0.000000405  |
| H |  | 0.000000581  | -0.000001860 | -0.000004236 |
| C |  | 0.000005138  | 0.000006362  | -0.000006403 |
| O |  | 0.000000183  | -0.000003079 | 0.000002129  |
| C |  | -0.000003248 | 0.000000748  | -0.000003307 |
| H |  | 0.000000790  | 0.000001690  | -0.000001551 |
| H |  | 0.000000239  | 0.000002318  | 0.000000452  |
| H |  | -0.000000275 | 0.000000523  | 0.000000759  |
| H |  | -0.000000472 | -0.000001251 | 0.000001569  |
| C |  | -0.000002421 | -0.000000350 | 0.000004034  |
| H |  | 0.000000669  | -0.000001838 | 0.000000365  |
| C |  | 0.000000615  | 0.000009516  | 0.000009395  |
| H |  | 0.000000598  | 0.000000296  | -0.000001175 |
| C |  | 0.000015870  | -0.000010366 | -0.000009802 |
| O |  | 0.000001174  | 0.000003662  | 0.000003580  |
| C |  | -0.000008323 | 0.000000561  | 0.000005008  |
| C |  | 0.000000921  | 0.000001070  | -0.000001166 |
| C |  | 0.000001184  | -0.000002295 | -0.000003709 |
| C |  | -0.000004812 | 0.000001308  | 0.000001974  |
| H |  | -0.000002042 | 0.000000745  | 0.000000550  |
| C |  | -0.000003130 | -0.000002368 | 0.000005945  |
| H |  | 0.000002131  | 0.000000413  | 0.000000120  |
| C |  | 0.000002987  | -0.000001138 | -0.000012460 |
| H |  | -0.000001610 | -0.000000060 | -0.000000069 |
| H |  | -0.000001003 | 0.000001622  | -0.000001010 |
| C |  | 0.000001746  | -0.000000313 | 0.000002543  |
| H |  | 0.000001466  | -0.000001697 | 0.000001679  |

## TS2-cis-4

B3LYP SCF energy: -898.080567 a.u.

B3LYP enthalpy: -898.061424 a.u.

B3LYP free energy: -898.129784 a.u.



Cartesian coordinate

|   |              |              |              |
|---|--------------|--------------|--------------|
| C | 0.000168431  | -0.000235887 | -0.000006185 |
| H | -0.000146787 | 0.000026097  | 0.000000122  |
| C | 0.000011872  | 0.000189789  | 0.000008212  |
| H | -0.000002251 | 0.000000216  | -0.000000818 |
| C | -0.000027741 | 0.000010637  | -0.000036299 |
| O | 0.000007814  | -0.000004766 | 0.000025259  |
| C | 0.000003670  | 0.000004363  | 0.000005604  |
| H | 0.000001031  | 0.000000886  | 0.000000532  |
| H | 0.000004971  | 0.000000692  | -0.000000332 |
| H | -0.000003832 | 0.000000216  | 0.000003696  |
| H | -0.000004011 | -0.000001551 | 0.000005735  |
| C | -0.000008020 | 0.000013784  | 0.000005049  |
| H | 0.000008470  | 0.000001967  | -0.000008795 |
| C | 0.000007562  | -0.000023002 | -0.000007080 |
| H | -0.000003729 | -0.000001036 | -0.000001467 |
| C | -0.000027859 | 0.000030186  | 0.000014729  |
| O | 0.000007786  | -0.000010442 | 0.000002425  |
| C | 0.000012242  | -0.000000358 | -0.000007982 |
| C | -0.000009829 | -0.000001793 | 0.000004002  |
| C | -0.000002674 | 0.000002557  | 0.000005276  |
| C | 0.000006816  | -0.000007445 | -0.000006037 |
| H | -0.000000312 | -0.000000735 | 0.000003386  |
| C | 0.000006296  | 0.000000972  | -0.000002289 |
| H | 0.000000574  | 0.000000920  | 0.000000209  |
| C | -0.000005120 | 0.000005714  | 0.000028713  |
| H | 0.000002031  | -0.000000017 | 0.000001524  |
| H | 0.000000143  | 0.000002365  | 0.000002785  |
| C | -0.000001467 | 0.000000053  | -0.000008410 |
| H | -0.000000882 | -0.000002243 | 0.000000091  |
| H | -0.000000474 | 0.000000884  | 0.000001361  |
| H | -0.000000964 | 0.000000303  | -0.000001319 |
| N | -0.000046071 | 0.000001447  | -0.000023912 |
| O | 0.000021862  | -0.000006797 | -0.000009154 |
| O | 0.000020451  | 0.000002024  | 0.000001371  |

NBO Charges

|   |    |          |
|---|----|----------|
| C | 1  | -0.21286 |
| H | 2  | 0.10739  |
| C | 3  | 0.06180  |
| H | 26 | 0.11466  |
| H | 27 | 0.11490  |
| C | 28 | -0.28513 |
| H | 29 | 0.09432  |

|   |    |          |
|---|----|----------|
| H | 30 | 0.08970  |
| H | 31 | 0.10371  |
| N | 32 | 0.24453  |
| O | 33 | -0.20033 |
| O | 34 | -0.20341 |

## TS1-5

B3LYP SCF energy: -748.860390 a.u.

B3LYP enthalpy: -748.841377 a.u.

B3LYP free energy: -748.910117 a.u.

Cartesian coordinate

|   |              |              |              |
|---|--------------|--------------|--------------|
| C | 0.000001631  | -0.000002305 | 0.000001852  |
| H | 0.000002252  | -0.000002399 | 0.000002708  |
| C | 0.000003820  | -0.000000157 | 0.000000640  |
| H | 0.000002191  | 0.000002774  | 0.000003555  |
| C | 0.000002862  | -0.000001631 | 0.000005277  |
| O | -0.000000705 | -0.000005911 | 0.000002656  |
| C | 0.000002906  | -0.000003069 | 0.000002921  |
| H | 0.000001620  | -0.000001086 | 0.000004515  |
| H | 0.000002195  | -0.000004356 | 0.000006496  |
| H | 0.000000303  | -0.000003930 | 0.000002657  |
| H | 0.000000838  | -0.000002944 | 0.000001863  |
| C | -0.000001029 | 0.000002775  | 0.000001407  |
| H | -0.000000380 | 0.000002393  | -0.000001119 |
| C | -0.000001741 | -0.000000933 | -0.000000582 |
| H | -0.000001691 | -0.000003420 | -0.000002396 |
| C | 0.000000885  | 0.000002545  | -0.000001156 |
| O | 0.000001564  | 0.000004789  | -0.000000736 |
| C | 0.000000066  | 0.000002301  | -0.000001209 |
| C | -0.000001223 | 0.000000127  | -0.000002246 |
| C | 0.000000483  | 0.000004888  | -0.000000563 |
| C | -0.000001605 | -0.000000496 | -0.000002586 |
| H | -0.000002726 | -0.000001628 | -0.000002309 |
| C | 0.000001130  | 0.000004803  | -0.000001057 |
| H | 0.000001864  | 0.000005775  | -0.000000072 |
| C | -0.000001185 | 0.000002070  | -0.000000289 |
| H | -0.000002260 | -0.000002028 | -0.000002834 |
| H | 0.000001441  | 0.000006180  | -0.000000295 |
| C | -0.000001377 | -0.000000175 | -0.000000911 |
| H | -0.000004995 | -0.000005818 | -0.000001719 |
| H | -0.000002627 | -0.000004374 | -0.000002122 |
| H | -0.000002642 | -0.000001790 | -0.000004319 |
| N | -0.000000665 | 0.000002022  | -0.000003666 |

|   |              |             |              |
|---|--------------|-------------|--------------|
| H | -0.00001047  | 0.000001710 | -0.000002485 |
| H | -0.000000153 | 0.000003297 | -0.000001877 |

NBO Charges

|   |    |          |
|---|----|----------|
| C | 1  | -0.12417 |
| H | 2  | 0.10329  |
| C | 3  | -0.11702 |
| H | 4  | 0.08712  |
| C | 5  | 0.24759  |
| O | 6  | -0.27965 |
| C | 7  | -0.32571 |
| H | 8  | 0.09229  |
| H | 9  | 0.10279  |
| H | 10 | 0.10341  |
| H | 11 | 0.10606  |
| C | 12 | -0.01994 |
| H | 13 | 0.10571  |
| C | 14 | -0.11519 |
| H | 15 | 0.08604  |
| C | 16 | 0.24396  |
| O | 17 | -0.27405 |
| C | 18 | -0.06608 |
| C | 19 | -0.07495 |
| C | 20 | -0.06335 |
| C | 21 | -0.14015 |
| H | 22 | 0.10061  |
| C | 23 | -0.13772 |
| H | 24 | 0.11457  |
| C | 25 | 0.08858  |
| H | 26 | 0.09458  |
| H | 27 | 0.09429  |
| C | 28 | -0.29718 |
| H | 29 | 0.10659  |
| H | 30 | 0.09970  |
| H | 31 | 0.09872  |
| N | 32 | -0.40086 |
| H | 33 | 0.18004  |
| H | 34 | 0.18009  |

## TS2-trans-5

B3LYP SCF energy: -748.860914 a.u.

B3LYP enthalpy: -748.842904 a.u.

B3LYP free energy: -748.907272 a.u.

Cartesian coordinate

|   |              |              |              |
|---|--------------|--------------|--------------|
| C | -0.000013028 | -0.000055252 | -0.000054128 |
| H | -0.000007807 | 0.000075292  | -0.000001051 |
| C | 0.000044312  | 0.000025479  | 0.000036658  |
| H | -0.000011970 | -0.000017987 | -0.000001835 |
| C | -0.000030820 | -0.000033904 | -0.000041329 |
| O | -0.000015023 | 0.000009740  | -0.000024945 |
| C | 0.000006159  | 0.000007813  | 0.000019258  |
| H | -0.000000176 | -0.000003533 | -0.000011165 |
| H | 0.000001828  | 0.000013273  | 0.000005137  |
| H | 0.000002055  | -0.000010492 | 0.000011099  |
| H | 0.000014922  | 0.000022455  | 0.000015236  |
| C | 0.000007898  | -0.000034624 | 0.000056766  |
| H | -0.000002194 | -0.000001235 | 0.000003562  |
| C | 0.000024402  | -0.000039211 | 0.000003978  |
| H | 0.000006176  | 0.000014857  | 0.000008676  |
| C | -0.000059775 | 0.000002275  | 0.000008756  |
| O | 0.000010624  | 0.000000020  | -0.000005063 |
| C | -0.000013580 | -0.000028601 | -0.000038568 |
| C | 0.000000292  | -0.000020079 | 0.000005641  |
| C | 0.000126046  | 0.000050498  | 0.000083761  |
| C | -0.000008334 | 0.000013910  | 0.000002473  |
| H | -0.000000660 | 0.000003104  | -0.000009751 |
| C | -0.000056365 | -0.000022474 | -0.000041387 |
| H | -0.000011218 | 0.000002328  | 0.000006486  |
| C | -0.000032824 | 0.000015727  | 0.000003301  |
| H | 0.000010370  | 0.000002360  | 0.000005651  |
| H | -0.000027095 | 0.000000674  | -0.000022972 |
| C | -0.000000394 | 0.000013909  | -0.000024138 |
| H | -0.000000218 | -0.000009579 | 0.000000577  |
| H | -0.000005727 | 0.000009263  | 0.000010712  |
| H | 0.000005746  | 0.000006352  | -0.000011318 |
| N | 0.000041405  | -0.000007020 | -0.000012184 |
| H | -0.000001664 | -0.000003474 | 0.000006980  |
| H | -0.000003362 | -0.000001867 | 0.000005125  |

NBO Charges

|   |   |          |
|---|---|----------|
| C | 1 | -0.19519 |
| H | 2 | 0.08936  |
| C | 3 | -0.07865 |
| H | 4 | 0.09940  |
| C | 5 | 0.27105  |
| O | 6 | -0.28004 |
| C | 7 | -0.32604 |
| H | 8 | 0.09854  |
| H | 9 | 0.10504  |

|   |    |          |
|---|----|----------|
| H | 10 | 0.10209  |
| H | 11 | 0.10505  |
| C | 12 | -0.12048 |
| H | 13 | 0.10739  |
| C | 14 | -0.06963 |
| H | 15 | 0.09692  |
| C | 16 | 0.26183  |
| O | 17 | -0.24754 |
| C | 18 | -0.07022 |
| C | 19 | -0.06457 |
| C | 20 | -0.05041 |
| C | 21 | -0.14669 |
| H | 22 | 0.10261  |
| C | 23 | -0.14722 |
| H | 24 | 0.11132  |
| C | 25 | 0.10213  |
| H | 26 | 0.09428  |
| H | 27 | 0.09274  |
| C | 28 | -0.28367 |
| H | 29 | 0.09162  |
| H | 30 | 0.09322  |
| H | 31 | 0.09962  |
| N | 32 | -0.40088 |
| H | 33 | 0.17873  |
| H | 34 | 0.17829  |

## TS2-cis-5

B3LYP SCF energy: -748.852739 a.u.

B3LYP enthalpy: -748.834715 a.u.

B3LYP free energy: -748.898979a.u.

Cartesian coordinate

|   |              |              |              |
|---|--------------|--------------|--------------|
| C | 0.000365753  | 0.000334678  | 0.000025959  |
| H | -0.000348110 | -0.000148910 | 0.000000110  |
| C | -0.000013484 | -0.000198270 | -0.000005285 |
| H | 0.000001027  | -0.000008583 | -0.000007922 |
| C | 0.000010856  | 0.000019000  | 0.000001735  |
| O | 0.000002368  | 0.000010060  | 0.000003489  |
| C | -0.000004087 | -0.000016058 | -0.000003507 |
| H | 0.000002045  | 0.000004963  | 0.000005043  |
| H | 0.000000057  | -0.000008518 | 0.000000217  |
| H | -0.000002801 | 0.000002634  | -0.000006306 |
| H | -0.000001728 | -0.000000784 | -0.000001270 |
| C | 0.000018965  | 0.000008199  | -0.000005020 |

|   |              |              |              |
|---|--------------|--------------|--------------|
| H | -0.000015798 | -0.000000099 | 0.000005560  |
| C | -0.000030024 | 0.000005197  | -0.000000477 |
| H | -0.000006034 | -0.000014884 | -0.000008858 |
| C | -0.000071438 | -0.000005304 | -0.000039626 |
| O | -0.000011772 | -0.000003544 | -0.000000820 |
| C | 0.000209441  | 0.000034237  | 0.000124172  |
| C | -0.000034176 | -0.000002867 | -0.000018266 |
| C | -0.000165907 | -0.000015987 | -0.000097515 |
| C | -0.000016152 | 0.000007874  | -0.000004765 |
| H | 0.000035033  | 0.000003003  | 0.000017649  |
| C | 0.000058011  | -0.000000401 | 0.000026689  |
| H | 0.000037926  | 0.000003224  | 0.000013280  |
| C | 0.000000164  | -0.000011222 | 0.000012325  |
| H | -0.000015963 | -0.000002237 | -0.000009715 |
| H | 0.000023777  | 0.000000083  | 0.000014538  |
| C | 0.000000704  | 0.000006283  | -0.000011752 |
| H | -0.000000779 | 0.000001168  | 0.000000103  |
| H | 0.000000299  | -0.000000200 | -0.000000588 |
| H | -0.000000890 | -0.000000762 | 0.000000118  |
| N | -0.000039738 | -0.000002709 | -0.000051683 |
| H | 0.000008293  | -0.000002808 | 0.000011991  |
| H | 0.000004161  | 0.000003546  | 0.000010394  |

NBO Charges

|   |    |          |
|---|----|----------|
| C | 1  | -0.19762 |
| H | 2  | 0.10460  |
| C | 3  | -0.07149 |
| H | 4  | 0.09352  |
| C | 5  | 0.26526  |
| O | 6  | -0.27213 |
| C | 7  | -0.32779 |
| H | 8  | 0.09377  |
| H | 9  | 0.10025  |
| H | 10 | 0.11561  |
| H | 11 | 0.08800  |
| C | 12 | -0.12172 |
| H | 13 | 0.11442  |
| C | 14 | -0.07011 |
| H | 15 | 0.08865  |
| C | 16 | 0.25410  |
| O | 17 | -0.23212 |
| C | 18 | -0.06873 |
| C | 19 | -0.06542 |
| C | 20 | -0.04770 |
| C | 21 | -0.14954 |

|   |    |          |
|---|----|----------|
| H | 22 | 0.09763  |
| C | 23 | -0.14809 |
| H | 24 | 0.11185  |
| C | 25 | 0.10490  |
| H | 26 | 0.09269  |
| H | 27 | 0.09282  |
| C | 28 | -0.28422 |
| H | 29 | 0.09233  |
| H | 30 | 0.08883  |
| H | 31 | 0.10227  |
| N | 32 | -0.40108 |
| H | 33 | 0.17804  |
| H | 34 | 0.17820  |

|   |  |             |              |              |
|---|--|-------------|--------------|--------------|
| C |  | -0.00000792 | -0.000002494 | 0.000003474  |
| H |  | -0.00000666 | -0.000001456 | 0.000001002  |
| H |  | -0.00000219 | -0.000002784 | 0.000004362  |
| H |  | -0.00000691 | -0.000002479 | 0.000002994  |
| C |  | 0.000002109 | 0.000005844  | 0.000001139  |
| H |  | 0.00000201  | 0.000001280  | -0.000003735 |
| H |  | 0.000001603 | 0.000001569  | -0.000000939 |
| C |  | -0.00000065 | -0.000001397 | -0.000002836 |
| H |  | -0.00000721 | 0.000001153  | -0.000002249 |
| H |  | 0.00000859  | 0.000001074  | -0.000001856 |
| H |  | 0.00000788  | 0.000002724  | -0.000002767 |

NBO Charges

|   |    |          |
|---|----|----------|
| C | 1  | -0.13238 |
| H | 2  | 0.10366  |
| C | 3  | -0.11074 |
| H | 4  | 0.08748  |
| C | 5  | 0.24745  |
| O | 6  | -0.28159 |
| C | 7  | -0.32529 |
| H | 8  | 0.09265  |
| H | 9  | 0.10315  |
| H | 10 | 0.10382  |
| H | 11 | 0.10805  |
| C | 12 | -0.01770 |
| H | 13 | 0.10809  |
| C | 14 | -0.11651 |
| H | 15 | 0.08872  |
| C | 16 | 0.24064  |
| O | 17 | -0.26525 |
| C | 18 | -0.04693 |
| C | 19 | -0.08687 |
| C | 20 | -0.07601 |
| C | 21 | -0.11514 |
| H | 22 | 0.10032  |
| C | 23 | -0.11566 |
| H | 24 | 0.11449  |
| C | 25 | -0.09764 |
| H | 26 | 0.09575  |
| H | 27 | 0.09565  |
| H | 28 | 0.09450  |
| C | 29 | -0.20273 |
| H | 30 | 0.10292  |
| H | 31 | 0.09786  |
| C | 32 | -0.29012 |

## TS1-6

B3LYP SCF energy: -732.797621 a.u.

B3LYP enthalpy: -732.778992 a.u.

B3LYP free energy: -732.846450 a.u.

Cartesian coordinate

|   |  |              |              |              |
|---|--|--------------|--------------|--------------|
| C |  | -0.000003461 | 0.000000154  | -0.000005905 |
| H |  | -0.00000631  | 0.000001168  | 0.000000876  |
| C |  | 0.000001628  | 0.000001951  | 0.000001531  |
| H |  | 0.000000053  | 0.000001087  | 0.000002331  |
| C |  | 0.00000617   | -0.000001897 | -0.000005116 |
| O |  | -0.000001317 | 0.000000874  | -0.000001608 |
| C |  | -0.00000359  | 0.000001152  | -0.000001424 |
| H |  | 0.000000214  | 0.000001241  | -0.000001243 |
| H |  | -0.000000736 | 0.000000171  | -0.000003396 |
| H |  | 0.000000335  | 0.000001875  | -0.000003595 |
| H |  | -0.000000574 | 0.000001761  | 0.000002276  |
| C |  | 0.000002866  | -0.000005694 | -0.000009156 |
| H |  | -0.000000570 | 0.000001787  | 0.000009559  |
| C |  | -0.000002579 | 0.000000245  | -0.000001146 |
| H |  | 0.000000324  | 0.000000055  | 0.000000293  |
| C |  | 0.000002194  | -0.000000060 | 0.000000833  |
| O |  | 0.000000308  | -0.000000408 | 0.000002893  |
| C |  | -0.000000288 | -0.000000795 | 0.0000002570 |
| C |  | 0.000000464  | -0.000001505 | 0.000001303  |
| C |  | -0.000000098 | -0.000001305 | 0.0000002319 |
| C |  | -0.000000809 | -0.000001331 | 0.000000626  |
| H |  | -0.000000153 | -0.000000242 | 0.000000172  |
| C |  | -0.000000015 | -0.000001686 | 0.0000002582 |
| H |  | 0.000000182  | -0.000001635 | 0.000003835  |

H 33 0.11379  
H 34 0.08923  
H 35 0.09233

## TS2-trans-6

B3LYP SCF energy: -732.800716 a.u.

B3LYP enthalpy: -732.782823 a.u.

B3LYP free energy: -732.847781 a.u.

Cartesian coordinate

|   |              |              |              |
|---|--------------|--------------|--------------|
| C | 0.000002633  | 0.000001987  | 0.000001603  |
| H | 0.000000885  | 0.000001154  | 0.000001424  |
| C | -0.000000658 | 0.000006988  | -0.000001397 |
| H | 0.000001855  | -0.000000865 | 0.000000428  |
| C | 0.000005930  | -0.000004608 | 0.000012631  |
| O | 0.000000782  | 0.000004341  | -0.000003691 |
| C | 0.000005438  | 0.000003967  | 0.000001960  |
| H | -0.000000928 | 0.000002361  | -0.000003983 |
| H | -0.000002613 | -0.000003133 | 0.000005250  |
| H | 0.000005556  | -0.000007317 | -0.000002105 |
| H | 0.000000231  | 0.000001633  | 0.000001293  |
| C | -0.000000056 | 0.000004382  | 0.000001296  |
| H | -0.000000012 | 0.000000665  | -0.000000354 |
| C | 0.000002389  | -0.000005051 | 0.000002698  |
| H | -0.000000157 | 0.000001639  | 0.000000749  |
| C | -0.000003403 | 0.000006367  | -0.000007811 |
| O | -0.000001539 | -0.000004223 | 0.000002975  |
| C | 0.000000342  | -0.000003093 | 0.000000219  |
| C | -0.000000899 | -0.000001749 | -0.000000154 |
| C | -0.000002222 | -0.000003539 | -0.000002546 |
| C | -0.000000071 | -0.000003145 | -0.000000946 |
| H | -0.000000094 | 0.000000103  | 0.000000606  |
| C | -0.000001402 | -0.000004712 | -0.000003128 |
| H | -0.000001097 | -0.000001568 | -0.000001242 |
| C | -0.000001899 | -0.000004795 | -0.000001930 |
| H | -0.000000440 | -0.000000989 | 0.000000090  |
| H | -0.000001385 | -0.000002929 | -0.000001953 |
| H | -0.000001216 | -0.000002659 | -0.000001270 |
| C | -0.000002091 | 0.000003513  | -0.000000568 |
| H | -0.000000360 | 0.000002109  | 0.000000273  |
| H | -0.000000682 | 0.000001836  | -0.000000324 |
| C | -0.000001799 | 0.000004861  | 0.000000179  |
| H | -0.000000048 | 0.000002081  | 0.000000420  |
| H | -0.000000619 | 0.000002655  | -0.000000199 |

H -0.000000352 0.000001732 -0.000000493

NBO Charges

|   |    |          |
|---|----|----------|
| C | 1  | -0.20032 |
| H | 2  | 0.09055  |
| C | 3  | -0.06067 |
| H | 4  | 0.09852  |
| C | 5  | 0.26006  |
| O | 6  | -0.27770 |
| C | 7  | -0.32510 |
| H | 8  | 0.09921  |
| H | 9  | 0.10479  |
| H | 10 | 0.10193  |
| H | 11 | 0.10577  |
| C | 12 | -0.12072 |
| H | 13 | 0.10800  |
| C | 14 | -0.06276 |
| H | 15 | 0.09739  |
| C | 16 | 0.24976  |
| O | 17 | -0.23803 |
| C | 18 | -0.04823 |
| C | 19 | -0.07932 |
| C | 20 | -0.06720 |
| C | 21 | -0.11950 |
| H | 22 | 0.10278  |
| C | 23 | -0.12299 |
| H | 24 | 0.11155  |
| C | 25 | -0.08680 |
| H | 26 | 0.09536  |
| H | 27 | 0.09387  |
| H | 28 | 0.09243  |
| C | 29 | -0.18785 |
| H | 30 | 0.09131  |
| H | 31 | 0.09790  |
| C | 32 | -0.28578 |
| H | 33 | 0.09542  |
| H | 34 | 0.09186  |
| H | 35 | 0.09452  |

## TS2-cis-6

B3LYP SCF energy: -732.792932 a.u.

B3LYP enthalpy: -732.775054 a.u.

B3LYP free energy: -732.839747 a.u.

Cartesian coordinate

|   |              |              |              |   |    |          |
|---|--------------|--------------|--------------|---|----|----------|
| C | -0.00006949  | 0.00000254   | 0.00000601   | H | 9  | 0.10054  |
| H | -0.00000713  | -0.00001257  | 0.00000974   | H | 10 | 0.11443  |
| C | 0.00005129   | -0.00001658  | 0.000002986  | H | 11 | 0.08884  |
| H | -0.00001650  | 0.000002463  | 0.000000789  | C | 12 | -0.12193 |
| C | -0.00001371  | 0.000002609  | 0.000004486  | H | 13 | 0.11547  |
| O | -0.00002500  | -0.000003809 | 0.000004872  | C | 14 | -0.06657 |
| C | -0.00005592  | -0.000002069 | -0.000000220 | H | 15 | 0.09059  |
| H | -0.00001892  | 0.000000170  | 0.000001687  | C | 16 | 0.24358  |
| H | -0.00003131  | 0.000002212  | 0.000002667  | O | 17 | -0.22245 |
| H | -0.00001361  | 0.000000491  | 0.000004520  | C | 18 | -0.04600 |
| H | 0.000000229  | 0.000000465  | 0.000001264  | C | 19 | -0.08070 |
| C | 0.000000131  | -0.000004796 | 0.000002598  | C | 20 | -0.06494 |
| H | 0.000001264  | -0.000002142 | 0.000000076  | C | 21 | -0.12207 |
| C | -0.00005749  | 0.000014659  | -0.000006830 | H | 22 | 0.09811  |
| H | 0.000001991  | -0.000002315 | -0.000001492 | C | 23 | -0.12309 |
| C | 0.000021243  | -0.000004073 | -0.000004216 | H | 24 | 0.11190  |
| O | -0.00001479  | -0.000001988 | 0.000004669  | C | 25 | -0.08463 |
| C | -0.00009847  | 0.000001185  | 0.000001326  | H | 26 | 0.09370  |
| C | 0.000000903  | 0.000002645  | -0.000003162 | H | 27 | 0.09392  |
| C | 0.000004330  | 0.000001911  | -0.000001441 | H | 28 | 0.09205  |
| C | -0.000002469 | 0.000004044  | -0.000001874 | C | 29 | -0.18816 |
| H | -0.000001453 | 0.000000349  | -0.000001161 | H | 30 | 0.08673  |
| C | -0.000001319 | 0.000003406  | -0.000002429 | H | 31 | 0.10063  |
| H | 0.000001176  | 0.000000762  | -0.000001255 | C | 32 | -0.28568 |
| C | 0.000001610  | 0.000004870  | -0.000004008 | H | 33 | 0.09436  |
| H | -0.000000723 | 0.000001468  | -0.000001136 | H | 34 | 0.09087  |
| H | 0.000000662  | 0.000002036  | -0.000001528 | H | 35 | 0.09709  |
| H | -0.000000008 | 0.000002332  | -0.000001557 |   |    |          |
| C | 0.000002672  | -0.000001503 | -0.000000817 |   |    |          |
| H | 0.000000562  | -0.000000264 | -0.000000759 |   |    |          |
| H | 0.000001283  | -0.000000817 | -0.000000900 |   |    |          |
| C | 0.000002390  | -0.000003104 | 0.000000492  |   |    |          |
| H | 0.000000301  | -0.000000540 | 0.000000317  |   |    |          |
| H | 0.000001029  | -0.000001547 | -0.000000311 |   |    |          |
| H | 0.000001302  | -0.000001587 | 0.000000771  |   |    |          |

#### NBO Charges

|   |   |          |
|---|---|----------|
| C | 1 | -0.20152 |
| H | 2 | 0.10527  |
| C | 3 | -0.05671 |
| H | 4 | 0.09300  |
| C | 5 | 0.25674  |
| O | 6 | -0.27065 |
| C | 7 | -0.32654 |
| H | 8 | 0.09381  |

## TS1-7

B3LYP SCF energy: -811.384583 a.u.

B3LYP enthalpy: -811.363325 a.u.

B3LYP free energy: -811.435734 a.u.

#### Cartesian coordinate

|   |              |              |              |
|---|--------------|--------------|--------------|
| C | -0.000004577 | -0.000001577 | -0.000003383 |
| H | 0.000002368  | 0.000000165  | -0.000001689 |
| C | 0.000000947  | -0.000000593 | 0.000001468  |
| H | -0.000000463 | -0.000000881 | 0.000000950  |
| C | 0.000001992  | -0.000000040 | -0.000002316 |
| O | 0.000000743  | 0.000002873  | -0.000003623 |
| C | 0.000000124  | 0.000001834  | -0.000002385 |
| H | 0.000000089  | 0.000000857  | -0.000000078 |
| H | 0.000001211  | 0.000001412  | -0.000002624 |
| H | -0.000000071 | 0.000003305  | -0.000001478 |

|   |              |              |              |   |              |              |              |
|---|--------------|--------------|--------------|---|--------------|--------------|--------------|
| H | 0.000001235  | -0.000001534 | -0.000000220 | C | -0.000001518 | 0.000003832  | -0.000007259 |
| O | 0.000003722  | 0.000001781  | 0.000001190  | H | -0.000000620 | 0.000004332  | -0.000005107 |
| H | -0.000001551 | -0.000000173 | 0.000002281  | H | -0.000002426 | 0.000001533  | -0.000008133 |
| C | -0.000001857 | -0.000001575 | -0.000000666 | H | -0.000001614 | 0.000005802  | -0.000009112 |
| H | 0.000000956  | 0.000001030  | -0.000000814 | H | -0.000000609 | 0.000003607  | -0.000004390 |
| C | 0.000000007  | -0.000003185 | 0.000001821  | C | 0.000000805  | 0.000002540  | 0.000000924  |
| O | -0.000000474 | -0.000003156 | 0.000002544  | H | 0.000002030  | 0.000004336  | 0.000002470  |
| C | 0.000000743  | -0.000003501 | 0.000000670  | C | 0.000000229  | 0.000000719  | 0.000000067  |
| C | 0.000001320  | -0.000002720 | -0.000000893 | H | -0.000000895 | -0.000001294 | -0.000001551 |
| C | 0.000000460  | -0.000005506 | 0.000001935  | C | 0.000000722  | -0.000000114 | 0.000002510  |
| C | 0.000002012  | -0.000003910 | -0.000001092 | O | 0.000002144  | 0.000001868  | 0.000004781  |
| H | 0.000001548  | -0.000001498 | -0.000001835 | C | 0.000000005  | -0.000002541 | 0.000001884  |
| C | 0.000000965  | -0.000006631 | 0.000001695  | C | -0.000001460 | -0.000004375 | -0.000000793 |
| H | 0.000000000  | -0.000006023 | 0.000003385  | C | 0.000000647  | -0.000003341 | 0.000004410  |
| C | 0.000001995  | -0.000005764 | 0.000000032  | C | -0.000002183 | -0.000006788 | -0.000001108 |
| H | 0.000002542  | -0.000003358 | -0.000002491 | H | -0.000002002 | -0.000003829 | -0.000002849 |
| H | 0.000001017  | -0.000007934 | 0.000002571  | C | -0.000000082 | -0.000005780 | 0.000004164  |
| H | 0.000002313  | -0.000006614 | -0.000000278 | H | 0.000001750  | -0.000001937 | 0.000006526  |
| C | -0.000001280 | 0.000003580  | 0.000000987  | C | -0.000001516 | -0.000007532 | 0.000001404  |
| C | -0.000001673 | 0.000002928  | 0.000001221  | H | -0.000003290 | -0.000008102 | -0.000003284 |
| H | -0.000002515 | 0.000005409  | 0.000000829  | H | 0.000000455  | -0.000006303 | 0.000006121  |
| H | -0.000002676 | 0.000003924  | 0.000002393  | H | -0.000002080 | -0.000009422 | 0.000001188  |
| H | -0.000002324 | 0.000003642  | 0.000000905  | C | 0.000001048  | 0.000000921  | 0.000002129  |
| C | 0.000000709  | 0.000004092  | -0.000001375 | C | 0.000001959  | 0.000003319  | 0.000001596  |
| H | 0.000000327  | 0.000003609  | -0.000002142 | H | 0.000001240  | 0.000004972  | -0.000000159 |
| H | 0.000000838  | 0.000003576  | -0.000002479 | H | 0.000001745  | 0.000002384  | 0.000003026  |
| H | -0.000001089 | 0.000005571  | -0.000002208 | H | 0.000003048  | 0.000005308  | 0.000003637  |
| C | -0.000002791 | 0.000003759  | 0.000001871  | C | -0.000000683 | -0.000001617 | -0.000000149 |
| H | -0.000002897 | 0.000003351  | 0.000003444  | H | -0.000000431 | -0.000002747 | 0.000000629  |
| H | -0.000002856 | 0.000006061  | 0.000001139  | H | -0.000001029 | -0.000000532 | -0.000002741 |
| H | -0.000001091 | 0.000003414  | 0.000000736  | H | -0.000001061 | -0.000003620 | -0.000000407 |

## TS2-trans-7

B3LYP SCF energy: -811.392034 a.u.

B3LYP enthalpy: -811.371535 a.u.

B3LYP free energy: -811.441382 a.u.

Cartesian coordinate

|   |              |             |              |
|---|--------------|-------------|--------------|
| C | 0.000000274  | 0.000004872 | -0.000002634 |
| H | 0.000001081  | 0.000007315 | -0.000002500 |
| C | 0.000000029  | 0.000004464 | -0.000003319 |
| H | 0.000000872  | 0.000005961 | -0.000002055 |
| C | -0.000001227 | 0.000003414 | -0.000006418 |
| O | -0.000002374 | 0.000002449 | -0.000008531 |

## TS2-cis-7

B3LYP SCF energy: -811.382862 a.u.

B3LYP enthalpy: -811.362663 a.u.

B3LYP free energy: -811.431362 a.u.

Cartesian coordinate

|   |              |              |             |
|---|--------------|--------------|-------------|
| C | 0.000002116  | -0.000010232 | 0.000007597 |
| H | -0.000005828 | -0.000000913 | 0.000000162 |

|   |              |              |              |                      |              |              |              |
|---|--------------|--------------|--------------|----------------------|--------------|--------------|--------------|
| C | -0.000018007 | 0.000005909  | -0.000012689 |                      |              |              |              |
| H | -0.000003348 | -0.000004470 | -0.000005763 | Cartesian coordinate |              |              |              |
| C | 0.000014310  | -0.000035823 | 0.000006602  | C                    | 0.000015585  | 0.000005182  | -0.000016810 |
| O | 0.000002899  | 0.000014927  | -0.000006693 | H                    | 0.000000346  | -0.000001703 | 0.000005692  |
| C | -0.000003704 | 0.000013635  | 0.000005735  | C                    | -0.000016563 | 0.000001351  | 0.000001236  |
| H | -0.000001344 | -0.000000129 | 0.000007001  | H                    | -0.000001281 | 0.000003607  | -0.000003429 |
| C | -0.000005701 | 0.000007299  | -0.000005087 | C                    | 0.000003732  | 0.000002356  | 0.000008275  |
| H | 0.000005423  | -0.000004931 | 0.000002847  | O                    | 0.000000199  | -0.000005592 | 0.000008037  |
| C | -0.000014638 | 0.000019241  | 0.000010546  | C                    | -0.000003075 | -0.000004565 | 0.000003757  |
| H | -0.000000990 | -0.000001769 | 0.000004306  | H                    | 0.000001060  | 0.000005118  | -0.000000560 |
| C | 0.000039640  | -0.000014749 | -0.000032420 | H                    | 0.000000142  | -0.000003050 | -0.000006763 |
| O | -0.000006152 | -0.000004068 | 0.000005942  | C                    | -0.000015406 | -0.000005961 | 0.000011221  |
| C | -0.000012897 | -0.000003969 | 0.000030005  | H                    | -0.000000395 | 0.000000240  | -0.000004332 |
| C | 0.000000409  | 0.000008345  | -0.000010222 | C                    | 0.000015871  | -0.000006464 | -0.000001565 |
| C | 0.000004262  | -0.000004181 | -0.000007113 | H                    | 0.000000988  | -0.000003526 | 0.000002499  |
| C | -0.000004226 | 0.000001293  | 0.000006399  | C                    | -0.000003802 | 0.000005629  | -0.000008113 |
| H | -0.000002577 | -0.000002751 | -0.000001015 | O                    | -0.000003359 | -0.000000615 | -0.000010934 |
| C | -0.000000737 | -0.000002098 | 0.000006171  | C                    | 0.000008328  | -0.000006624 | 0.000000829  |
| H | 0.000004392  | -0.000001159 | -0.000000313 | C                    | -0.000000348 | 0.000006572  | 0.000003416  |
| C | -0.000000347 | 0.000000529  | -0.000006087 | C                    | -0.000005606 | -0.000003072 | -0.000005774 |
| H | -0.000005136 | -0.000000515 | -0.000000486 | C                    | 0.000006978  | 0.000008696  | 0.000006732  |
| H | 0.000002133  | 0.000001048  | -0.000000985 | H                    | 0.000002781  | 0.000004375  | 0.000002384  |
| H | -0.000002407 | 0.000000354  | -0.000000499 | C                    | -0.000000225 | -0.000001629 | -0.000002118 |
| C | 0.000004521  | -0.000011717 | 0.000009791  | H                    | -0.000001298 | -0.000003288 | -0.000003542 |
| H | 0.000002855  | -0.000006152 | 0.000002786  | C                    | -0.000004385 | 0.000000506  | 0.000003271  |
| H | -0.000002243 | -0.000007590 | 0.000001667  | H                    | 0.000001565  | 0.000004771  | 0.000004433  |
| H | 0.000004162  | -0.000007028 | 0.000004618  | H                    | -0.000004171 | -0.000002790 | -0.000002290 |
| C | -0.000000107 | 0.000003748  | -0.000000357 | H                    | -0.000001261 | 0.000001842  | 0.000001934  |
| H | -0.000001825 | 0.000007231  | -0.000001437 | C                    | 0.000002246  | -0.000010002 | -0.000007252 |
| H | -0.000001248 | 0.000003559  | -0.000001820 | H                    | 0.000000582  | -0.000003989 | -0.000000350 |
| H | 0.000000117  | 0.000005687  | -0.000004454 | H                    | 0.000000169  | -0.000002784 | 0.000002382  |
| C | -0.000002590 | 0.000007216  | -0.000002440 | H                    | -0.000000428 | -0.000006088 | -0.000000481 |
| H | -0.000002597 | 0.000003977  | -0.000000664 | C                    | 0.000000796  | 0.000001241  | 0.000001166  |
| H | -0.000003103 | 0.000003493  | -0.000002993 | H                    | -0.000001155 | 0.000001918  | 0.000005947  |
| H | -0.000001090 | 0.000002647  | 0.000000107  | H                    | 0.000003927  | -0.000001750 | 0.000002117  |
| O | 0.000005359  | 0.000000327  | -0.000004823 | H                    | -0.000000132 | 0.000002374  | 0.000006830  |
| H | 0.000006898  | 0.000005034  | -0.000001180 | C                    | -0.000002601 | 0.000008613  | 0.000003577  |
| H | 0.000001236  | 0.000001847  | 0.000002596  | H                    | -0.000001983 | 0.000002635  | -0.000004917 |
| H | 0.000002109  | 0.000006896  | -0.000005339 | H                    | 0.000001863  | 0.000001124  | -0.000002564 |
|   |              |              |              | H                    | 0.000000318  | 0.000005343  | -0.000003944 |

## TS1-8

B3LYP SCF energy: -772.093982 a.u.

B3LYP enthalpy: -772.073904 a.u.

B3LYP free energy: -772.145299 a.u.

## NBO Charges

C 1 -0.04240

H 2 0.10662

C 3 -0.10763



|   |    |          |   |              |              |              |
|---|----|----------|---|--------------|--------------|--------------|
| H | 4  | 0.08691  | H | 0.00000569   | -0.000003040 | -0.00000904  |
| C | 5  | 0.24698  | C | -0.000032756 | -0.000044768 | 0.000021258  |
| O | 6  | -0.28368 | O | 0.000020250  | 0.000002160  | 0.000003328  |
| C | 7  | -0.22450 | C | -0.000006271 | 0.000010693  | 0.000000894  |
| H | 8  | 0.09094  | H | 0.000008452  | -0.000013461 | -0.000009942 |
| H | 9  | 0.10054  | H | 0.000017078  | 0.000005432  | 0.000007700  |
| C | 10 | -0.02489 | H | -0.000007158 | -0.000000072 | 0.000011211  |
| H | 11 | 0.10509  | C | -0.000023188 | 0.000013401  | -0.000030262 |
| C | 12 | -0.10494 | H | -0.000003660 | 0.000005629  | 0.000009723  |
| H | 13 | 0.08813  | C | -0.000031909 | -0.000062244 | -0.000012435 |
| C | 14 | 0.23489  | H | 0.000000626  | 0.000003863  | -0.000003505 |
| O | 15 | -0.26115 | C | -0.000004386 | 0.000052098  | 0.000067560  |
| C | 16 | -0.04597 | O | 0.000011492  | -0.000003233 | -0.000015409 |
| C | 17 | -0.08790 | C | 0.000015846  | -0.000010483 | -0.000045172 |
| C | 18 | -0.07761 | C | -0.000014522 | -0.000004566 | 0.000013939  |
| C | 19 | -0.11439 | C | 0.000003210  | 0.000008078  | 0.000015124  |
| H | 20 | 0.10242  | C | 0.000004448  | -0.000006003 | -0.000002028 |
| C | 21 | -0.11526 | H | 0.000001223  | 0.000002662  | 0.000007287  |
| H | 22 | 0.11327  | C | 0.000009658  | -0.000007805 | -0.000005494 |
| C | 23 | -0.09903 | H | -0.000001366 | 0.000001529  | -0.000000888 |
| H | 24 | 0.09630  | C | -0.000004238 | 0.000002687  | 0.000006045  |
| H | 25 | 0.09569  | H | 0.000003137  | -0.000001908 | 0.000004241  |
| H | 26 | 0.09474  | H | 0.000000493  | -0.000000631 | -0.000000579 |
| C | 27 | -0.29400 | H | 0.000003676  | -0.000002863 | 0.000001936  |
| H | 28 | 0.10280  | C | 0.000012127  | -0.000002625 | -0.000002428 |
| H | 29 | 0.10420  | H | -0.000005571 | 0.000004307  | 0.000000566  |
| H | 30 | 0.09826  | H | -0.000004822 | -0.000000302 | 0.000000693  |
| C | 31 | -0.28488 | H | -0.000007149 | 0.000000147  | 0.000001024  |
| H | 32 | 0.10567  | C | -0.000002406 | -0.000005347 | -0.000002002 |
| H | 33 | 0.08868  | H | -0.000000872 | 0.000001410  | -0.000000818 |
| H | 34 | 0.09351  | H | 0.000010091  | -0.000002274 | -0.000005175 |
| C | 35 | -0.29395 | H | 0.000008598  | 0.000002067  | 0.000005373  |
| H | 36 | 0.09669  | C | -0.000017566 | 0.000004205  | -0.000010865 |
| H | 37 | 0.11137  | H | -0.000000446 | 0.000002528  | -0.000001001 |
| H | 38 | 0.09849  | H | -0.000005741 | 0.000000718  | 0.000001471  |
|   |    |          | H | -0.000001332 | 0.000001916  | -0.000005862 |

## TS2-trans-8

B3LYP SCF energy: -772.099921 a.u.

B3LYP enthalpy: -772.080626 a.u.

B3LYP free energy: -772.148542 a.u.

Cartesian coordinate

|   |             |              |              |
|---|-------------|--------------|--------------|
| C | 0.000026310 | -0.000015189 | -0.000015716 |
| C | 0.000018080 | 0.000061285  | -0.000008887 |

NBO Charges

|   |   |          |
|---|---|----------|
| C | 1 | -0.12142 |
| C | 2 | -0.06634 |
| H | 3 | 0.09990  |
| C | 4 | 0.26591  |
| O | 5 | -0.27741 |
| C | 6 | -0.22459 |
| H | 7 | 0.09609  |

|   |    |          |   |              |              |              |
|---|----|----------|---|--------------|--------------|--------------|
| H | 8  | 0.10337  | H | -0.000005317 | 0.000000800  | 0.000001053  |
| H | 9  | 0.10532  | H | -0.000006283 | 0.000000756  | -0.000003135 |
| C | 10 | -0.11876 | H | 0.000003638  | 0.000002320  | 0.000000677  |
| H | 11 | 0.10801  | C | 0.000005762  | -0.000002023 | 0.000000501  |
| C | 12 | -0.06002 | H | 0.000002914  | -0.000004866 | -0.000004704 |
| H | 13 | 0.09721  | C | 0.000011104  | 0.000006224  | -0.000000111 |
| C | 14 | 0.25097  | H | 0.000001722  | -0.000002664 | 0.000000474  |
| O | 15 | -0.23762 | C | -0.000010111 | -0.000006337 | 0.000013109  |
| C | 16 | -0.04840 | O | 0.000005771  | -0.000003042 | -0.000006543 |
| C | 17 | -0.07941 | C | -0.000000002 | 0.000004535  | -0.000006879 |
| C | 18 | -0.06724 | C | 0.000001765  | 0.000000795  | 0.000005057  |
| C | 19 | -0.11932 | C | -0.000003251 | -0.000000905 | 0.000004357  |
| H | 20 | 0.10264  | C | -0.000001427 | 0.000004861  | 0.000003767  |
| C | 21 | -0.12268 | H | 0.000000349  | 0.000002628  | 0.000004346  |
| H | 22 | 0.11152  | C | -0.000003784 | 0.000001924  | 0.000000248  |
| C | 23 | -0.08691 | H | -0.000000362 | -0.000001074 | -0.000001869 |
| H | 24 | 0.09548  | C | -0.000001548 | 0.000000807  | 0.000006663  |
| H | 25 | 0.09399  | H | -0.000002187 | 0.000004040  | 0.000007046  |
| H | 26 | 0.09259  | H | -0.000002735 | 0.000000736  | 0.000001267  |
| C | 27 | -0.28423 | H | -0.000003493 | 0.000003288  | 0.000005777  |
| H | 28 | 0.09209  | C | 0.000005839  | -0.000000717 | 0.000000191  |
| H | 29 | 0.09345  | H | 0.000008514  | -0.000003046 | -0.000001143 |
| H | 30 | 0.10013  | H | 0.000008096  | -0.000001938 | 0.000002492  |
| C | 31 | -0.28127 | H | 0.000007352  | -0.000003138 | -0.000000170 |
| H | 32 | 0.09022  | C | -0.000006689 | 0.000000611  | -0.000003982 |
| H | 33 | 0.10262  | H | -0.000007705 | 0.000002093  | -0.000003556 |
| H | 34 | 0.09255  | H | -0.000007964 | 0.000001551  | -0.000004975 |
| C | 35 | -0.28303 | H | -0.000007641 | -0.000000920 | -0.000005451 |
| H | 36 | 0.09812  | C | 0.000004496  | -0.000003063 | -0.000002714 |
| H | 37 | 0.09243  | H | 0.000001381  | 0.000000029  | 0.000000325  |
| H | 38 | 0.09405  | H | 0.000006641  | -0.000002044 | -0.000002041 |
|   |    |          | H | 0.000001740  | -0.000002742 | -0.000004198 |

## TS2-cis-8

B3LYP SCF energy: -772.088934 a.u.

B3LYP enthalpy: -772.069642 a.u.

B3LYP free energy: -772.137344 a.u.

Cartesian coordinate

|   |              |              |              |
|---|--------------|--------------|--------------|
| C | -0.000000384 | 0.000002678  | -0.000001222 |
| C | 0.000010140  | 0.000000633  | -0.000004676 |
| H | -0.000000798 | -0.000004881 | 0.000003906  |
| C | -0.000023337 | 0.000002898  | -0.000002166 |
| O | 0.000008375  | -0.000004533 | -0.000000286 |
| C | -0.000000583 | 0.000003724  | -0.000001435 |

NBO Charges

|   |    |          |
|---|----|----------|
| C | 1  | -0.11285 |
| C | 2  | -0.05897 |
| H | 3  | 0.09409  |
| C | 4  | 0.26390  |
| O | 5  | -0.27661 |
| C | 6  | -0.23011 |
| H | 7  | 0.09231  |
| H | 8  | 0.11385  |
| H | 9  | 0.08664  |
| C | 10 | -0.12118 |
| H | 11 | 0.11624  |

|   |    |          |   |  |              |              |              |
|---|----|----------|---|--|--------------|--------------|--------------|
| C | 12 | -0.06494 | H |  | -0.000017492 | -0.000003774 | -0.000000210 |
| H | 13 | 0.08999  | C |  | 0.000000067  | -0.000052547 | 0.000125189  |
| C | 14 | 0.24425  | O |  | -0.000009639 | 0.000028136  | -0.000068285 |
| O | 15 | -0.21793 | C |  | 0.000189327  | -0.000052483 | -0.000035282 |
| C | 16 | -0.04734 | C |  | -0.000024698 | 0.000016822  | 0.000093255  |
| C | 17 | -0.07933 | C |  | -0.000080550 | 0.000057198  | -0.000129687 |
| C | 18 | -0.06317 | C |  | 0.000034917  | 0.000004300  | 0.000017937  |
| C | 19 | -0.12261 | H |  | 0.000002877  | 0.000009106  | -0.000009389 |
| H | 20 | 0.09783  | C |  | -0.000082704 | -0.000001288 | 0.000089105  |
| C | 21 | -0.12376 | H |  | -0.000026009 | 0.000004738  | 0.000011982  |
| H | 22 | 0.11180  | C |  | 0.000001069  | 0.000009753  | -0.000034362 |
| C | 23 | -0.08262 | H |  | 0.000012198  | -0.000027642 | -0.000007519 |
| H | 24 | 0.09364  | H |  | 0.000001753  | -0.000006131 | -0.000008808 |
| H | 25 | 0.09389  | H |  | -0.000012052 | 0.000006440  | -0.000025299 |
| H | 26 | 0.09192  | C |  | 0.000018924  | -0.000017329 | 0.000000919  |
| C | 27 | -0.28529 | H |  | 0.000018328  | 0.000014561  | 0.000014453  |
| H | 28 | 0.09281  | H |  | -0.000003851 | -0.000012273 | 0.000001027  |
| H | 29 | 0.08940  | H |  | 0.000000864  | 0.000021815  | -0.000018399 |
| H | 30 | 0.10375  | O |  | -0.000020638 | 0.000004155  | -0.000005422 |
| C | 31 | -0.28563 | C |  | 0.000018835  | -0.000009119 | 0.000009215  |
| H | 32 | 0.09011  | H |  | -0.000002271 | 0.000009817  | 0.000000876  |
| H | 33 | 0.09160  | H |  | -0.000004218 | -0.000005635 | 0.000003986  |
| H | 34 | 0.10694  | H |  | 0.000001753  | -0.000001906 | -0.000008475 |
| C | 35 | -0.28896 |   |  |              |              |              |
| H | 36 | 0.09228  |   |  |              |              |              |
| H | 37 | 0.08923  |   |  |              |              |              |
| H | 38 | 0.11483  |   |  |              |              |              |

## TS1-9

B3LYP SCF energy: -768.750127 a.u.

B3LYP enthalpy: -768.731776 a.u.

B3LYP free energy: -768.799026 a.u.

Cartesian coordinate

|   |  |              |              |              |
|---|--|--------------|--------------|--------------|
| C |  | -0.000221792 | 0.000022255  | 0.000093290  |
| H |  | 0.000180243  | 0.000063323  | -0.000000681 |
| C |  | 0.000065828  | -0.000168767 | -0.000094190 |
| H |  | -0.000024394 | 0.000022743  | -0.000000706 |
| C |  | -0.000029058 | 0.000019723  | -0.000069010 |
| O |  | 0.000008078  | -0.000003978 | 0.000082335  |
| H |  | -0.000002738 | -0.000011773 | -0.000012739 |
| C |  | 0.000096060  | 0.000008552  | -0.000035175 |
| H |  | 0.000007277  | 0.000011109  | -0.000006317 |
| C |  | -0.000096296 | 0.000040099  | 0.000026387  |

NBO Charges

|   |    |          |
|---|----|----------|
| C | 1  | -0.18793 |
| H | 2  | 0.12427  |
| C | 3  | -0.11825 |
| H | 4  | 0.11365  |
| C | 5  | 0.37884  |
| O | 6  | -0.30782 |
| H | 7  | 0.12975  |
| C | 8  | -0.04160 |
| H | 9  | 0.12996  |
| C | 10 | -0.13411 |
| H | 11 | 0.10208  |
| C | 12 | 0.24188  |
| O | 13 | -0.26165 |
| C | 14 | -0.05102 |
| C | 15 | -0.10295 |
| C | 16 | -0.09241 |
| C | 17 | -0.13635 |
| H | 18 | 0.11815  |
| C | 19 | -0.13710 |
| H | 20 | 0.13261  |

|   |    |          |
|---|----|----------|
| C | 21 | -0.11594 |
| H | 22 | 0.11524  |
| H | 23 | 0.11519  |
| H | 24 | 0.11350  |
| C | 25 | -0.35225 |
| H | 26 | 0.12297  |
| H | 27 | 0.11809  |
| H | 28 | 0.11915  |
| O | 29 | -0.28691 |
| C | 30 | -0.16848 |
| H | 31 | 0.10770  |
| H | 32 | 0.10473  |
| H | 33 | 0.10701  |

## TS2-trans-9

B3LYP SCF energy: -858.786696 a.u.

B3LYP enthalpy: -858.769282 a.u.

B3LYP free energy: -858.833629 a.u.

### Cartesian coordinate

|   |              |              |              |
|---|--------------|--------------|--------------|
| C | 0.000035180  | -0.000010094 | -0.000043169 |
| C | -0.000058393 | 0.000051833  | 0.000032653  |
| H | 0.000000210  | -0.000015246 | -0.000002131 |
| C | -0.000051970 | 0.000029768  | -0.000123981 |
| O | 0.000119720  | -0.000052150 | 0.000093693  |
| H | -0.000029005 | -0.000003094 | 0.000014443  |
| C | -0.000005049 | -0.000001902 | 0.000016848  |
| H | 0.000008882  | -0.000003280 | -0.000005682 |
| C | -0.000001906 | -0.000052227 | -0.000011953 |
| H | 0.000011768  | 0.000006005  | -0.000003154 |
| C | -0.000010643 | 0.000004029  | -0.000006217 |
| O | -0.000004127 | 0.000003497  | 0.000010611  |
| C | 0.000002900  | 0.000025040  | -0.000018544 |
| C | -0.000002680 | -0.000005143 | 0.000020787  |
| C | 0.000014118  | -0.000016109 | 0.000023823  |
| C | -0.000001127 | 0.000025497  | -0.000016705 |
| H | -0.000016686 | 0.000018970  | 0.000000437  |
| C | 0.000007968  | 0.000021360  | -0.000017898 |
| H | 0.000012579  | 0.000003944  | -0.000006415 |
| C | 0.000005278  | -0.000014769 | 0.000024976  |
| H | -0.000015968 | 0.000005965  | 0.000014576  |
| H | 0.000014549  | -0.000011010 | 0.000001966  |
| H | -0.000002119 | 0.000003267  | -0.000000240 |
| C | 0.000001454  | -0.000020060 | 0.000001134  |

|   |              |              |              |
|---|--------------|--------------|--------------|
| H | -0.000004401 | -0.000009346 | -0.000002936 |
| H | -0.000019605 | 0.000006258  | 0.000001948  |
| H | 0.000016338  | 0.000010336  | 0.000000961  |
| N | 0.000149303  | 0.000022458  | 0.000139153  |
| O | 0.000046731  | -0.000027089 | -0.000046559 |
| O | -0.000195017 | 0.000001002  | -0.000102572 |
| H | -0.000028282 | 0.000002293  | 0.000010146  |

### NBO Charges

|   |    |          |
|---|----|----------|
| C | 1  | -0.19566 |
| H | 2  | 0.09022  |
| C | 3  | -0.07120 |
| H | 4  | 0.10068  |
| C | 5  | 0.38719  |
| O | 6  | -0.28791 |
| H | 7  | 0.10556  |
| C | 8  | -0.12179 |
| H | 9  | 0.10747  |
| C | 10 | -0.06280 |
| H | 11 | 0.09670  |
| C | 12 | 0.24717  |
| O | 13 | -0.23497 |
| C | 14 | -0.05135 |
| C | 15 | -0.07928 |
| C | 16 | -0.06640 |
| C | 17 | -0.11904 |
| H | 18 | 0.10325  |
| C | 19 | -0.12337 |
| H | 20 | 0.11159  |
| C | 21 | -0.08583 |
| H | 22 | 0.09602  |
| H | 23 | 0.09399  |
| H | 24 | 0.09259  |
| C | 25 | -0.28384 |
| H | 26 | 0.09217  |
| H | 27 | 0.09330  |
| H | 28 | 0.10026  |
| O | 29 | -0.28694 |
| C | 30 | -0.10676 |
| H | 31 | 0.08614  |
| H | 32 | 0.07831  |
| H | 33 | 0.09452  |

## TS2-cis-9

B3LYP SCF energy: -858.785043 a.u.

B3LYP enthalpy: -858.767600 a.u.

B3LYP free energy: -858.832198 a.u.

Cartesian coordinate

|   |              |              |              |
|---|--------------|--------------|--------------|
| C | 0.000043837  | -0.000227220 | -0.000002576 |
| C | -0.000158035 | 0.000435382  | 0.000024294  |
| H | 0.000016815  | -0.000233742 | -0.000018846 |
| C | 0.000017150  | 0.000090996  | -0.000095196 |
| O | -0.000006744 | -0.000015386 | 0.000032100  |
| H | -0.000006724 | -0.000026662 | -0.000003944 |
| C | 0.000069287  | -0.000088494 | 0.000027760  |
| H | -0.000003601 | 0.000031262  | 0.000002939  |
| C | 0.000035370  | 0.000036519  | -0.000034136 |
| H | -0.000001636 | -0.000001833 | 0.000009042  |
| C | 0.000023160  | 0.000006041  | -0.000016548 |
| O | 0.000001106  | 0.000000783  | 0.000046349  |
| C | 0.000004831  | -0.000045307 | -0.000006130 |
| C | -0.000002504 | 0.000026830  | 0.000005249  |
| C | -0.000003170 | 0.000004659  | -0.000013161 |
| C | -0.000012526 | 0.000000512  | -0.000017249 |
| H | -0.000001569 | 0.000003912  | -0.000013441 |
| C | -0.000027511 | -0.000009990 | -0.000018051 |
| H | -0.000002244 | -0.000000911 | -0.000003359 |
| C | 0.000031185  | -0.000001076 | 0.000032571  |
| H | -0.000002685 | -0.000005148 | -0.000000631 |
| H | -0.000000662 | 0.000000242  | -0.000002661 |
| H | 0.000001399  | -0.000000182 | 0.000003338  |
| C | -0.000020185 | 0.000001666  | -0.000000553 |
| H | 0.000014670  | 0.000010666  | 0.000006008  |
| H | -0.000000493 | -0.000019946 | 0.000006051  |
| H | -0.000013246 | 0.000006148  | -0.000012963 |
| N | -0.000010720 | 0.000001173  | -0.000018240 |
| O | 0.000017670  | -0.000018671 | 0.000032143  |
| O | -0.000005037 | 0.000027547  | 0.000045462  |
| H | 0.000002810  | 0.000010233  | 0.000004380  |

NBO Charges

|   |   |          |
|---|---|----------|
| C | 1 | -0.19133 |
| C | 2 | -0.11390 |
| H | 3 | 0.11341  |
| C | 4 | 0.30318  |
| O | 5 | -0.19231 |
| H | 6 | 0.09128  |
| C | 7 | -0.13135 |
| H | 8 | 0.11426  |

|   |    |          |
|---|----|----------|
| C | 9  | -0.00698 |
| H | 10 | 0.09370  |
| C | 11 | 0.23452  |
| O | 12 | -0.23556 |
| C | 13 | -0.04898 |
| C | 14 | -0.08813 |
| C | 15 | -0.08257 |
| C | 16 | -0.10792 |
| H | 17 | 0.11404  |
| C | 18 | -0.11305 |
| H | 19 | 0.11038  |
| C | 20 | -0.10230 |
| H | 21 | 0.09915  |
| H | 22 | 0.09619  |
| H | 23 | 0.09557  |
| C | 24 | -0.28320 |
| H | 25 | 0.09466  |
| H | 26 | 0.09033  |
| H | 27 | 0.10202  |
| N | 28 | 0.22255  |
| O | 29 | -0.18468 |
| O | 30 | -0.19714 |
| H | 31 | 0.10417  |

## TS1-10

B3LYP SCF energy: -748.855528 a.u.

B3LYP enthalpy: -748.837087 a.u.

B3LYP free energy: -748.903579 a.u.

Cartesian coordinate

|   |              |              |              |
|---|--------------|--------------|--------------|
| C | -0.000000278 | 0.000002791  | -0.000002439 |
| H | -0.000001129 | 0.000001458  | -0.000006114 |
| C | -0.000003955 | 0.000002633  | -0.000003820 |
| H | -0.000002949 | -0.000007809 | -0.000003713 |
| C | -0.000000605 | 0.000006617  | -0.000002358 |
| O | -0.000000120 | 0.000005926  | -0.000004394 |
| C | -0.000001030 | 0.000003635  | -0.000004025 |
| H | -0.000001305 | 0.000001014  | -0.000004157 |
| H | -0.000001344 | 0.000006641  | -0.000006606 |
| H | 0.000000287  | 0.000005868  | -0.000000416 |
| C | 0.000001332  | -0.000008867 | 0.000003175  |
| H | -0.000000001 | -0.000000557 | 0.000003300  |
| C | 0.0000003110 | -0.000001005 | 0.000001035  |
| H | 0.000000890  | 0.000001434  | 0.000002980  |

|   |             |             |             |
|---|-------------|-------------|-------------|
| C | 0.00000384  | -0.00002677 | 0.00002172  |
| O | -0.00002506 | -0.00005224 | -0.00000598 |
| C | -0.00000336 | -0.00002196 | 0.00000241  |
| C | 0.00002379  | 0.00004410  | 0.00003430  |
| C | 0.00000223  | -0.00004855 | 0.00000757  |
| C | 0.00001463  | 0.00004216  | 0.00003047  |
| H | 0.00002445  | 0.00005752  | 0.00003004  |
| C | 0.00000340  | -0.00001312 | 0.00000939  |
| H | -0.00001279 | -0.00005639 | -0.00000004 |
| C | 0.00001461  | 0.00002051  | 0.00002706  |
| H | 0.00002687  | 0.00007846  | 0.00004049  |
| H | -0.00000299 | -0.00004086 | 0.00000825  |
| H | 0.00001607  | 0.00003271  | 0.00002884  |
| C | -0.00003369 | 0.00003687  | 0.00002144  |
| H | 0.00004147  | -0.00008314 | 0.00004579  |
| H | 0.00003121  | 0.00001864  | 0.00004021  |
| H | 0.00002681  | -0.00000732 | 0.00006848  |
| N | 0.00000439  | -0.00006882 | -0.00002440 |
| H | -0.00005925 | -0.00004795 | -0.00006022 |
| H | -0.00002567 | -0.00006166 | -0.00005031 |

#### NBO Charges

|   |    |          |
|---|----|----------|
| C | 1  | 0.03302  |
| H | 2  | 0.10119  |
| C | 3  | -0.09660 |
| H | 4  | 0.09054  |
| C | 5  | 0.23841  |
| O | 6  | -0.27946 |
| C | 7  | -0.32467 |
| H | 8  | 0.09245  |
| H | 9  | 0.10207  |
| H | 10 | 0.10311  |
| C | 11 | -0.03009 |
| H | 12 | 0.11284  |
| C | 13 | -0.10033 |
| H | 14 | 0.08819  |
| C | 15 | 0.24122  |
| O | 16 | -0.28217 |
| C | 17 | -0.04663 |
| C | 18 | -0.08554 |
| C | 19 | -0.07700 |
| C | 20 | -0.11492 |
| H | 21 | 0.10189  |
| C | 22 | -0.11554 |
| H | 23 | 0.11415  |

|   |    |          |
|---|----|----------|
| C | 24 | -0.09809 |
| H | 25 | 0.09629  |
| H | 26 | 0.09569  |
| H | 27 | 0.09466  |
| C | 28 | -0.29640 |
| H | 29 | 0.10115  |
| H | 30 | 0.10602  |
| H | 31 | 0.09737  |
| N | 32 | -0.43735 |
| H | 33 | 0.17640  |
| H | 34 | 0.19815  |

## TS2-trans-10

B3LYP SCF energy: -748.858412a.u.

B3LYP enthalpy: -748.840863 a.u.

B3LYP free energy: -748.905360a.u.

#### Cartesian coordinate

|   |             |              |              |
|---|-------------|--------------|--------------|
| C | -0.00000605 | 0.00001349   | 0.000017865  |
| H | -0.00002877 | -0.00000870  | -0.00001259  |
| C | 0.00004476  | -0.000013319 | -0.000008972 |
| H | -0.00001787 | 0.00000627   | 0.000005372  |
| C | -0.00005776 | 0.00003448   | 0.000002408  |
| O | 0.000010127 | -0.000011188 | 0.000002003  |
| C | -0.00000716 | -0.00007276  | 0.000004326  |
| H | -0.00000024 | -0.00000484  | 0.000001959  |
| H | 0.000006716 | -0.000003302 | 0.000003521  |
| H | -0.00000853 | -0.000003350 | 0.000005156  |
| C | -0.00004408 | 0.000005567  | -0.000004955 |
| H | 0.000000745 | -0.000000794 | -0.000003033 |
| C | -0.00003026 | -0.000003202 | -0.000002175 |
| H | 0.000008722 | 0.000005338  | 0.000001439  |
| C | -0.00006943 | -0.00001146  | -0.000004423 |
| O | -0.00002417 | 0.000000227  | -0.000001212 |
| C | -0.00000486 | 0.000000659  | -0.000000723 |
| C | 0.00001345  | 0.000000622  | 0.000000719  |
| C | -0.00003462 | 0.000000353  | -0.000002660 |
| C | 0.00001149  | 0.000001494  | 0.000000138  |
| H | 0.00001268  | 0.000001177  | 0.000000320  |
| C | -0.00002654 | 0.000001122  | -0.000001620 |
| H | -0.00004044 | 0.000000467  | -0.000002744 |
| C | -0.00000268 | 0.000001510  | -0.000000733 |
| H | 0.000002711 | 0.000001613  | 0.000001082  |
| H | -0.00003424 | 0.000001041  | -0.000002490 |

|   |              |             |              |
|---|--------------|-------------|--------------|
| H | 0.000000230  | 0.000001586 | -0.000000433 |
| C | -0.000001046 | 0.000000338 | -0.000000373 |
| H | -0.000002322 | 0.000003406 | -0.000002549 |
| H | -0.000000695 | 0.000003237 | -0.000002816 |
| H | -0.000002944 | 0.000002770 | -0.000001878 |
| N | 0.000005915  | 0.000001033 | -0.000005614 |
| H | 0.000002071  | 0.000002897 | -0.000000227 |
| H | 0.000005297  | 0.000003050 | 0.000004579  |

NBO Charges

|   |    |          |
|---|----|----------|
| C | 1  | -0.02570 |
| H | 2  | 0.07901  |
| C | 3  | 0.01081  |
| H | 4  | 0.09465  |
| C | 5  | 0.20292  |
| O | 6  | -0.26836 |
| C | 7  | -0.31993 |
| H | 8  | 0.10269  |
| H | 9  | 0.10077  |
| H | 10 | 0.09803  |
| C | 11 | -0.13824 |
| H | 12 | 0.10621  |
| C | 13 | 0.04226  |
| H | 14 | 0.09847  |
| C | 15 | 0.18428  |
| O | 16 | -0.24950 |
| C | 17 | -0.03772 |
| C | 18 | -0.09301 |
| C | 19 | -0.09123 |
| C | 20 | -0.11109 |
| H | 21 | 0.10747  |
| C | 22 | -0.11086 |
| H | 23 | 0.11306  |
| C | 24 | -0.11081 |
| H | 25 | 0.09677  |
| H | 26 | 0.09528  |
| H | 27 | 0.09493  |
| C | 28 | -0.28001 |
| H | 29 | 0.09134  |
| H | 30 | 0.09564  |
| H | 31 | 0.10202  |
| N | 32 | -0.43835 |
| H | 33 | 0.16511  |
| H | 34 | 0.19308  |

## TS2-cis-10

B3LYP SCF energy: -748.852860 a.u.

B3LYP enthalpy: -748.835261 a.u.

B3LYP free energy: -748.898464 a.u.

Cartesian coordinate

|   |              |              |              |
|---|--------------|--------------|--------------|
| C | -0.000005951 | 0.000011775  | -0.000001088 |
| C | 0.000006484  | 0.000008690  | 0.000006588  |
| H | -0.000006974 | 0.000006769  | 0.000005475  |
| C | 0.000000160  | -0.000003666 | -0.000013899 |
| O | -0.000005255 | -0.000004991 | 0.000013516  |
| C | -0.000000900 | -0.000002693 | 0.000010783  |
| H | -0.000003712 | 0.000001478  | 0.000008825  |
| H | -0.000001919 | -0.000003821 | 0.000011677  |
| H | 0.000000078  | -0.000002100 | 0.000007476  |
| H | 0.000000567  | 0.000001542  | 0.000000201  |
| C | -0.000001000 | -0.000000901 | 0.000004632  |
| H | 0.000002160  | -0.000007339 | -0.000000836 |
| C | 0.000002568  | -0.000009053 | 0.000003112  |
| H | 0.000001417  | 0.000003481  | -0.000003792 |
| C | -0.000012340 | -0.000003742 | -0.000005814 |
| O | 0.000003794  | -0.000003892 | -0.000001603 |
| C | 0.000007525  | 0.000002593  | -0.000002869 |
| C | -0.000002302 | 0.000003486  | 0.000000492  |
| C | -0.000001489 | -0.000001914 | -0.000003910 |
| C | 0.000000802  | 0.000006244  | -0.000001106 |
| H | -0.000002203 | 0.000005607  | -0.000000316 |
| C | 0.000002235  | 0.000001129  | -0.000003408 |
| H | 0.000001845  | -0.000004081 | -0.000003345 |
| C | -0.000002139 | 0.000004105  | -0.000001940 |
| H | -0.000002004 | 0.000009196  | -0.000000661 |
| H | 0.000001050  | -0.000000918 | -0.000003431 |
| H | -0.000000784 | 0.000005943  | -0.000002156 |
| C | 0.000002059  | -0.000001983 | -0.000008745 |
| H | 0.000002789  | -0.000002944 | -0.000007253 |
| H | 0.000001853  | 0.000001337  | -0.000007926 |
| H | 0.000003122  | -0.000002393 | -0.000007842 |
| N | -0.000008801 | -0.000012378 | 0.000004018  |
| H | 0.000007891  | -0.000004294 | -0.000001597 |
| H | 0.000009374  | -0.000000273 | 0.000006741  |

NBO Charges

|   |   |          |
|---|---|----------|
| C | 1 | -0.01536 |
| C | 2 | -0.08022 |
| H | 3 | 0.09481  |

C 4 0.26602  
 O 5 -0.28181  
 C 6 -0.32659  
 H 7 0.09430  
 H 8 0.10137  
 H 9 0.11575  
 H 10 0.08350  
 C 11 -0.12527  
 H 12 0.11700  
 C 13 -0.06114  
 H 14 0.08997  
 C 15 0.24559  
 O 16 -0.21907  
 C 17 -0.04723  
 C 18 -0.07971  
 C 19 -0.06358  
 C 20 -0.12220  
 H 21 0.09778  
 C 22 -0.12321  
 H 23 0.11202  
 C 24 -0.08318  
 H 25 0.09378  
 H 26 0.09410  
 H 27 0.09213  
 C 28 -0.28505  
 H 29 0.09927  
 H 30 0.08846  
 H 31 0.10127  
 N 32 -0.43005  
 H 33 0.19071  
 H 34 0.16585

C -0.00000304 0.00001127 -0.000002148  
 H 0.00000019 -0.000000911 -0.000003025  
 H -0.000000014 0.000002758 -0.000003886  
 H 0.00000180 0.000001437 0.000000030  
 C 0.000001173 -0.000004667 -0.000000144  
 H 0.000001252 -0.000002230 0.000001830  
 C -0.000001539 0.000001431 0.000003374  
 H 0.000001229 0.000001482 0.000001761  
 C -0.000000682 -0.000003244 0.000001920  
 O -0.000000079 -0.000004615 0.000000145  
 C 0.000000398 -0.000000082 0.000001330  
 C -0.000000473 0.000001745 -0.000000231  
 C 0.000000032 -0.000003747 0.000001733  
 C 0.000001044 0.000002741 0.000000085  
 H -0.000000130 0.000003210 -0.000000049  
 C -0.000000346 -0.000002244 0.000002230  
 H -0.000000317 -0.000005979 0.000002388  
 C -0.000000288 0.000000416 0.000000507  
 H 0.000000340 0.000005318 -0.000000542  
 H -0.000000209 -0.000004156 0.000002129  
 H 0.000000191 0.000001428 0.000000993  
 C 0.000000314 0.000001688 0.000003634  
 H -0.000000180 0.000000090 0.000003432  
 H 0.000000018 0.000002888 0.000004007  
 H 0.000000131 -0.000000136 0.000006283  
 N -0.000000738 0.000002371 -0.000007275  
 O 0.000000308 -0.000005780 -0.000003407  
 O 0.000000727 -0.000000829 -0.000004274

NBO Charges

C 1 -0.01080  
 H 2 0.11708  
 C 3 -0.04168  
 H 4 0.10210  
 C 5 0.22957  
 O 6 -0.25980  
 C 7 -0.32310  
 H 8 0.09485  
 H 9 0.10426  
 H 10 0.10429  
 C 11 -0.09848  
 H 12 0.11395  
 C 13 -0.03798  
 H 14 0.08903  
 C 15 0.22484

**TS1-11**

B3LYP SCF energy: -898.079402a.u.

B3LYP enthalpy: -898.059666 a.u.

B3LYP free energy: -898.130041 a.u.

Cartesian coordinate

C -0.000002591 -0.000000017 -0.000001437  
 H 0.000000552 0.000003534 -0.000001910  
 C -0.000000688 0.000000795 -0.000002917  
 H 0.000000307 -0.000003559 -0.000003506  
 C -0.000000088 0.000002932 -0.000002733  
 O 0.000000448 0.000004803 -0.000000327



O 16 -0.24578  
 C 17 -0.04438  
 C 18 -0.08863  
 C 19 -0.08326  
 C 20 -0.10983  
 H 21 0.10670  
 C 22 -0.11080  
 H 23 0.11223  
 C 24 -0.10435  
 H 25 0.09757  
 H 26 0.09674  
 H 27 0.09601  
 C 28 -0.28649  
 H 29 0.10461  
 H 30 0.10255  
 H 31 0.09866  
 N 32 0.24802  
 O 33 -0.19837  
 O 34 -0.19932

C 0.00000785 0.000007099 0.000008244  
 C 0.000004034 -0.000001343 0.000000055  
 H 0.000001310 -0.000002136 -0.000000504  
 C 0.000008231 -0.000003289 -0.000003364  
 H 0.000002335 -0.000000691 0.000000307  
 C -0.000001575 -0.000001056 0.000006818  
 H 0.000002116 -0.000001882 0.000003576  
 H 0.000003770 -0.000001231 0.000001317  
 H 0.000003935 -0.000001786 0.000003142  
 C 0.000011093 0.000006443 0.000000689  
 H -0.000002743 0.000002004 0.000000806  
 H -0.000005060 0.000003230 0.000000615  
 H -0.000003096 0.000001273 0.000000792  
 N -0.000034052 -0.000013370 0.000001448  
 O -0.000006609 -0.000002145 -0.000027707  
 O 0.000022837 0.000000723 0.000012322

NBO Charges

C 1 -0.03976  
 C 2 -0.08802  
 H 3 0.11412  
 C 4 0.27001  
 O 5 -0.27373  
 C 6 -0.32551  
 H 7 0.10274  
 H 8 0.10524  
 H 9 0.10623  
 H 10 0.12247  
 C 11 -0.11797  
 H 12 0.11721  
 C 13 -0.06020  
 H 14 0.09929  
 C 15 0.25443  
 O 16 -0.23039  
 C 17 -0.05241  
 C 18 -0.07849  
 C 19 -0.06488  
 C 20 -0.11902  
 H 21 0.10211  
 C 22 -0.12167  
 H 23 0.11182  
 C 24 -0.08389  
 H 25 0.09644  
 H 26 0.09519  
 H 27 0.09359

**TS2-trans-11**

B3LYP SCF energy: -898.085426 a.u.

B3LYP enthalpy: -898.066271 a.u.

B3LYP free energy: -898.134996 a.u.

Cartesian coordinate

C 0.000016646 0.000035420 -0.000015169  
 C 0.000003101 0.000021308 -0.000001452  
 H 0.000000875 0.000005546 -0.000001609  
 C -0.000016742 -0.000014866 0.000005176  
 O 0.000009598 -0.000001872 0.000004505  
 C 0.000001752 0.000013131 -0.000002985  
 H 0.000002708 -0.000005196 0.000000323  
 H 0.000003321 -0.000002238 0.000001528  
 H -0.000001116 -0.000007397 -0.000003955  
 H -0.000002702 -0.000008299 0.000001984  
 C -0.000028763 -0.000018375 -0.000011323  
 H 0.000001249 -0.000002398 0.000000774  
 C 0.000001258 -0.000014169 0.000004147  
 H -0.000008119 -0.000010125 0.000006396  
 C -0.000018497 0.000038761 0.000023994  
 O 0.000014812 -0.000001868 -0.000004570  
 C 0.000018059 -0.000017069 -0.000020997  
 C -0.000004749 -0.000002137 0.000004676

|   |    |          |
|---|----|----------|
| C | 28 | -0.28610 |
| H | 29 | 0.10182  |
| H | 30 | 0.09520  |
| H | 31 | 0.10269  |
| N | 32 | 0.24947  |
| O | 33 | -0.18981 |
| O | 34 | -0.20820 |

|   |              |              |              |
|---|--------------|--------------|--------------|
| H | 0.00000776   | -0.000001011 | 0.000002752  |
| N | 0.00000290   | 0.000010446  | 0.000003246  |
| O | -0.000002268 | 0.000003470  | -0.000004617 |
| O | 0.000001663  | -0.000003538 | -0.000006888 |

NBO Charges

|   |    |          |
|---|----|----------|
| C | 1  | -0.03462 |
| H | 2  | 0.12117  |
| C | 3  | -0.08214 |
| H | 4  | 0.11142  |
| C | 5  | 0.26285  |
| O | 6  | -0.26729 |
| C | 7  | -0.32608 |
| H | 8  | 0.09653  |
| H | 9  | 0.10301  |
| H | 10 | 0.11561  |
| C | 11 | -0.11520 |
| H | 12 | 0.12233  |
| C | 13 | -0.06397 |
| H | 14 | 0.09968  |
| C | 15 | 0.24630  |
| O | 16 | -0.22487 |
| C | 17 | -0.05149 |
| C | 18 | -0.07990 |
| C | 19 | -0.06557 |
| C | 20 | -0.11930 |
| H | 21 | 0.10010  |
| C | 22 | -0.12083 |
| H | 23 | 0.11271  |
| C | 24 | -0.08552 |
| H | 25 | 0.09563  |
| H | 26 | 0.09528  |
| H | 27 | 0.09359  |
| C | 28 | -0.29110 |
| H | 29 | 0.09891  |
| H | 30 | 0.09838  |
| H | 31 | 0.10588  |
| N | 32 | 0.25174  |
| O | 33 | -0.19901 |
| O | 34 | -0.20425 |

## TS2-cis-11

B3LYP SCF energy: -898.075534a.u.

B3LYP enthalpy: -898.056456 a.u.

B3LYP free energy: -898.124596 a.u.

Cartesian coordinate

|   |              |              |              |
|---|--------------|--------------|--------------|
| C | -0.000016137 | -0.000020025 | 0.000017094  |
| H | -0.000000591 | 0.000008039  | -0.000005030 |
| C | 0.000006068  | -0.000004336 | 0.000000935  |
| H | 0.000001982  | 0.000012622  | 0.000004328  |
| C | -0.000000619 | 0.000000762  | -0.000009294 |
| O | 0.000002251  | 0.000008793  | 0.000001996  |
| C | 0.000006132  | -0.000003418 | 0.000003022  |
| H | -0.000002865 | 0.000003999  | -0.000006264 |
| H | -0.000002155 | 0.000001102  | -0.000000358 |
| H | -0.000001617 | 0.000006123  | -0.000002573 |
| C | -0.000005255 | 0.000023539  | -0.000000944 |
| H | 0.000004333  | -0.000002159 | -0.000002811 |
| C | -0.000003855 | -0.000008939 | -0.000017804 |
| H | 0.000007611  | 0.000000320  | 0.000001410  |
| C | -0.000009838 | -0.000009461 | 0.000011400  |
| O | 0.000004185  | 0.000002478  | -0.000003261 |
| C | 0.000004092  | -0.000013232 | -0.000007740 |
| C | 0.000000444  | -0.000000868 | 0.000000698  |
| C | -0.000000971 | 0.000003004  | 0.000004758  |
| C | 0.000000439  | 0.000000512  | 0.000000840  |
| H | -0.000000354 | -0.000000442 | 0.000002517  |
| C | 0.000002980  | -0.000002101 | -0.000000265 |
| H | 0.000002250  | 0.000000141  | 0.000001855  |
| C | 0.000000451  | -0.000001929 | 0.000003170  |
| H | 0.000000043  | -0.000002424 | 0.000000214  |
| H | 0.000001227  | -0.000000360 | 0.000002384  |
| H | 0.000000961  | -0.000001826 | 0.000001488  |
| C | -0.000002718 | -0.000006617 | 0.000002552  |
| H | 0.000000392  | -0.000000242 | 0.000001148  |
| H | 0.000000672  | -0.000002424 | 0.000000038  |
